# Supplementary material for: Dissecting the expression relationships between RNA-binding proteins and their cognate targets in eukaryotic post-transcriptional regulatory networks
Source: PubMed Central journal article supplement (PMC4861959; doi:10.1038/srep25711), 2016-05-10
Supplement: srep25711-s1.pdf [file srep25711-s1.pdf]

# **Dissecting the expression relationships between RNA-binding proteins and their cognate targets in eukaryotic post-transcriptional regulatory networks**

Sneha Nishtala<sup>1</sup>, Yaseswini Neelamraju<sup>1</sup>, Sarath Chandra Janga<sup>1,2,3,\*</sup>

<sup>1</sup>Department of Bio Health Informatics, School of Informatics and Computing, Indiana University Purdue University, 719 Indiana Ave Ste 319, Walker Plaza Building, Indianapolis, Indiana 46202

<sup>2</sup>Centre for Computational Biology and Bioinformatics, Indiana University School of Medicine, 5021 Health Information and Translational Sciences (HITS), 410 West 10th Street, Indianapolis, Indiana, 46202

<sup>3</sup>Department of Medical and Molecular Genetics, Indiana University School of Medicine, Medical Research and Library Building, 975 West Walnut Street, Indianapolis, Indiana, 46202

*\*Correspondence should be addressed to: Sarath Chandra Janga ([scjanga@iupui.edu](mailto:scjanga@iupui.edu))*

*719 Indiana Avenue Ste 319, Walker Plaza Building*

*Indianapolis, Indiana - 46202*

*Tel: +1-317-278-4147, Fax: +1-317-278-9201*

## Legends:

**Supplementary figure 1:** Figure showing correlation patterns for all the 60 human RBPs organized into SC, SIC and NSC categories when the transcript levels of RBPs and their target/non-target transcripts are considered. RNA-sequencing based expression data from the Human Body Map (HBM) project for 16 human tissues was employed in this analysis.

**Supplementary figure 2:** Figure showing correlation patterns of all the 65 yeast RBPs organized into SC, SIC and NSC categories using the RNA-seq based expression profiles across 18 conditions and a constructed post-transcriptional regulatory network for yeast RBPs.

**Supplementary figure 3:** Figure showing correlation patterns of all the 58 RBPs organized into SC, SIC and NSC categories using the protein expression levels of RBPs in matched tissues with RNA-seq data.

**Supplementary figure 4:** Standardized coefficients from the feature selection analysis using elastic net for RBP centric modelling. a) At the transcript level, nTT: number of target transcripts, nPCT: number of protein coding transcripts, LPCT: Length of selected protein coding transcript, MPC: mRNA-protein correlation, mCS: median CLIP signal, mD: median distance of binding site from target transcript are the features in the order of importance. b) At the protein level, mCS, median CLIP signal, RBD: number of RNA binding domains, mD: median distance of binding site from transcript, LPCT: length of protein coding transcript, MPC: mRNA – protein correlation are the features in the order of importance.

**Supplementary figure 5:** Heatmaps showing the transcript centric modelling without clustering when a) transcript levels of RBPs are considered and b) protein levels of RBPs are considered.

**Supplementary table 1:** Table showing network centrality properties of RBPs belonging to sync and non-sync groups using Biogrid and String database.

Sync RBPs (12) - RBPs which shows similar level of association at both the transcript and protein level belong to this group. Non-sync RBPs (31) - RBPs which are SC at transcript and SIC at protein level or vice-versa belong to this group.

Supplementary figure 1  
Transcript level correlation

# Significantly Congruent

### AGO2

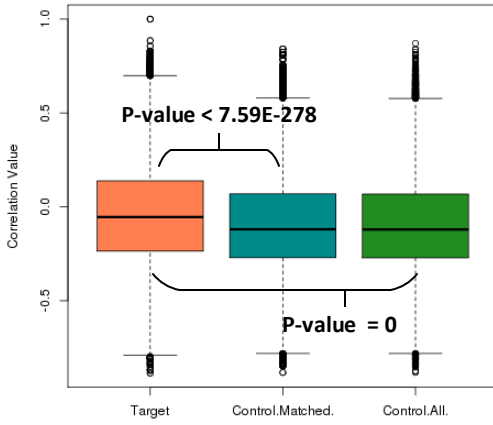

### CPSF7

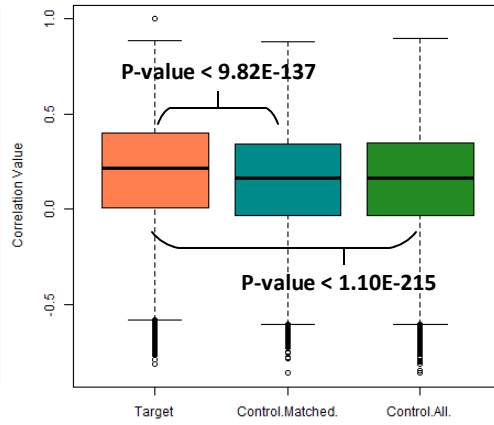

### PTBP1

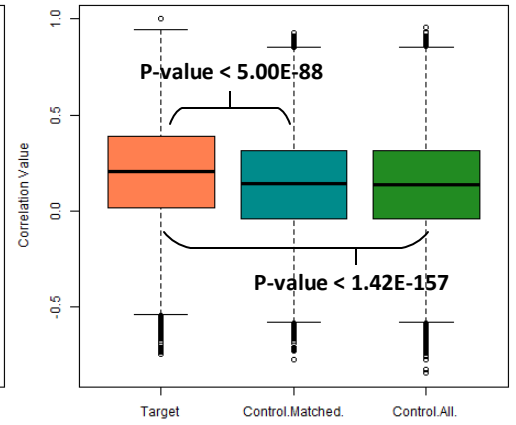

### TIAL1

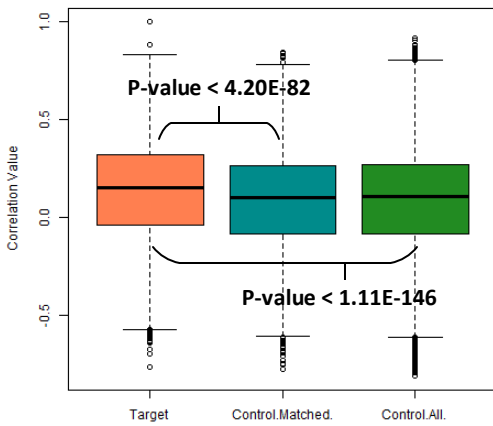

### NUDT21

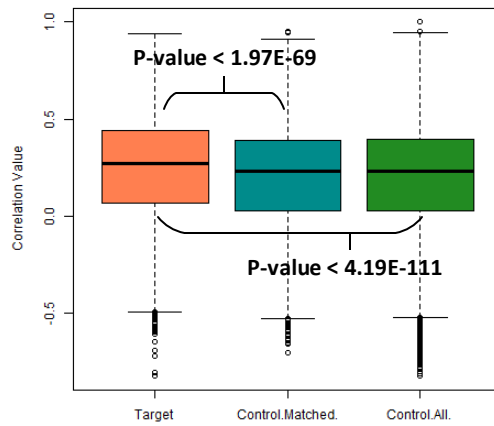

### CSTF2T

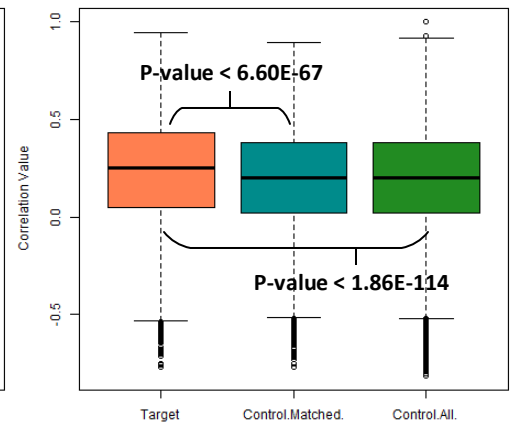

### HNRNPC

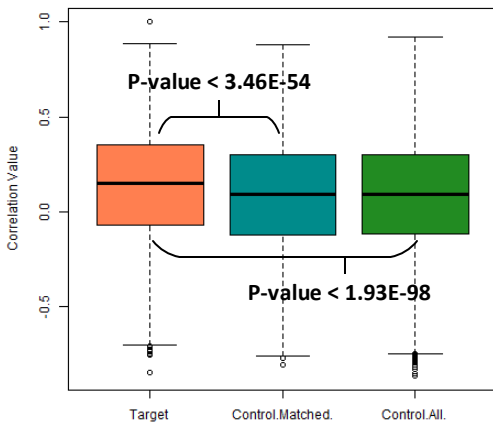

### CAPRIN1

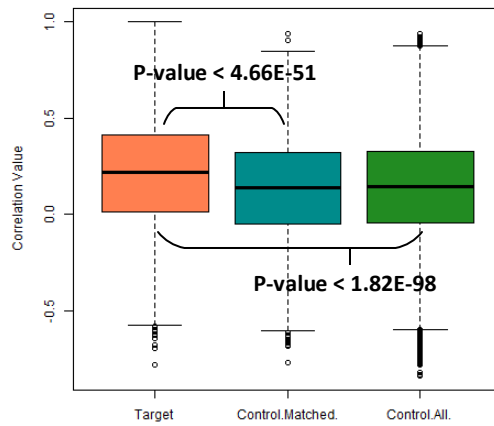

### HNRNPU

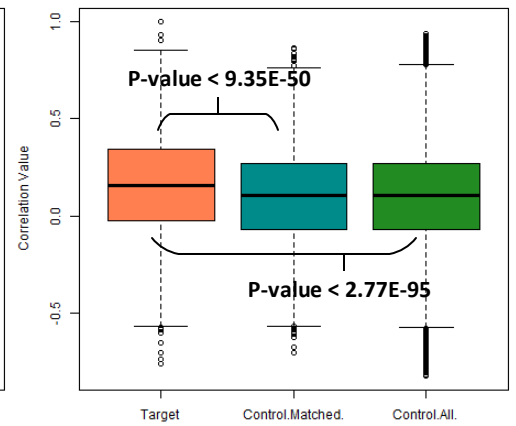

### IGF2BP3

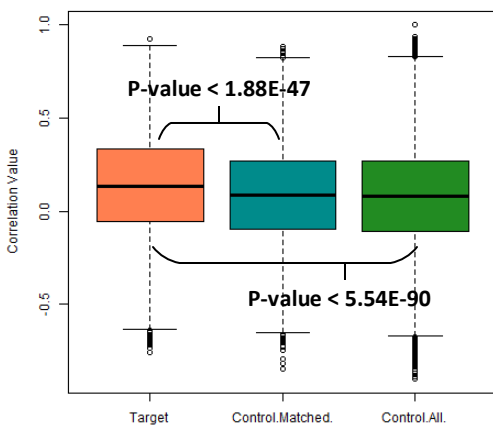

### EIF4A3

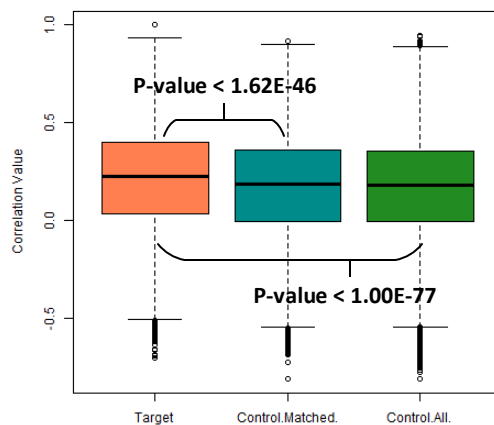

### CSTF2

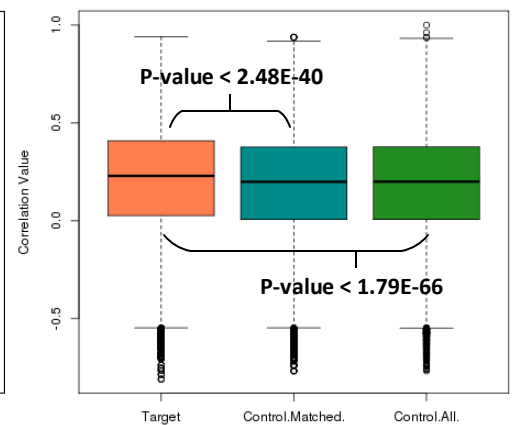

# Significantly Congruent

### FBL

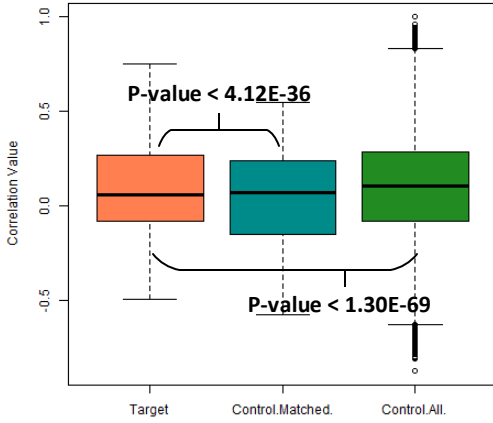

### DGCR8

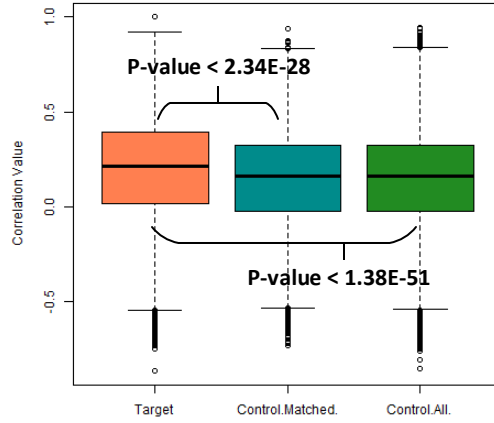

### NOP58

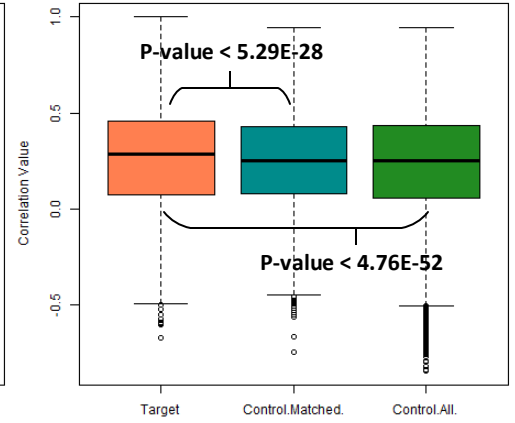

### HNRNPD

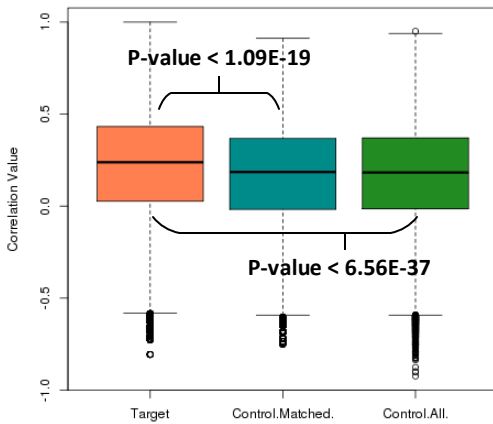

### TARDBP

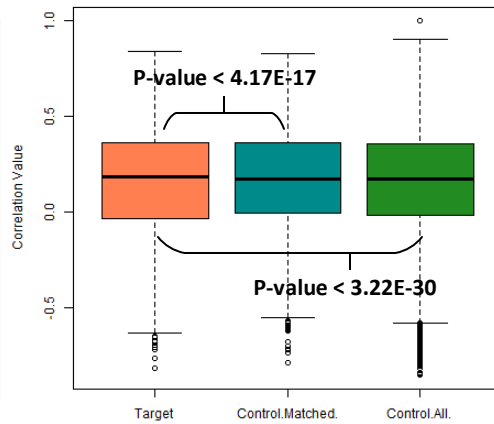

### CPSF4

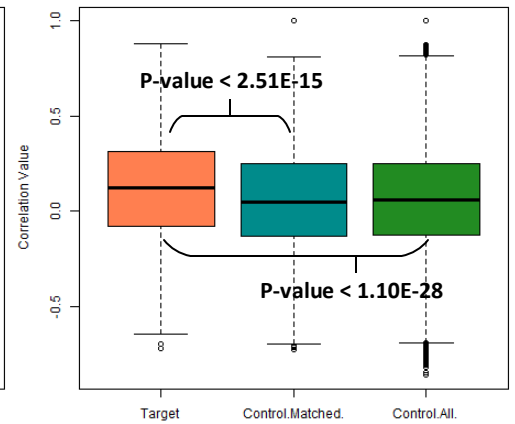

### ALKBH5

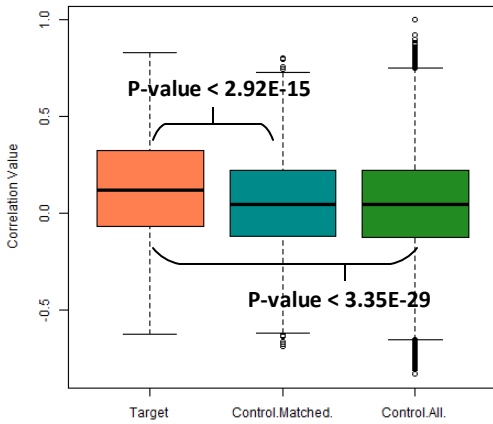

### HNRNPH

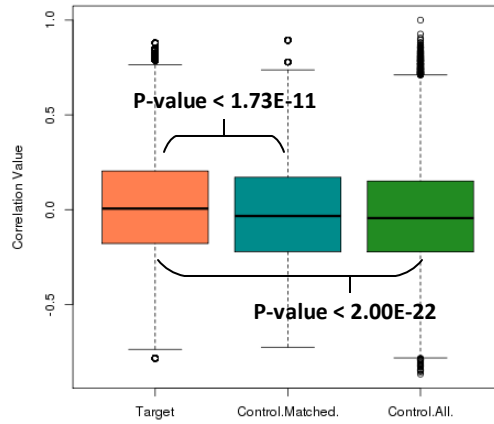

### AGO1

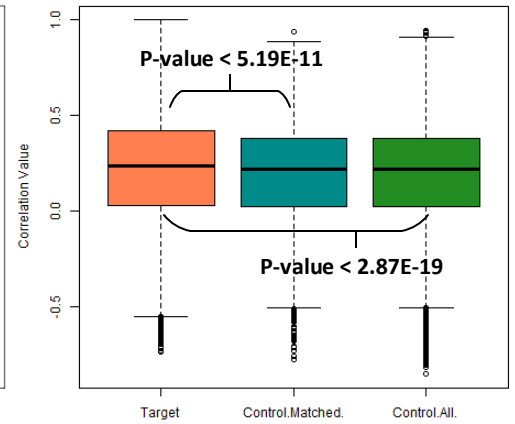

### EWSR1

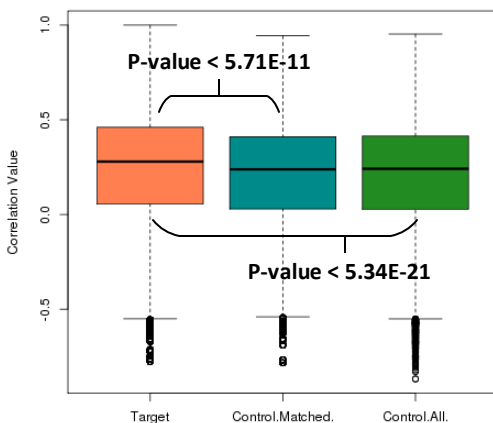

### CPSF2

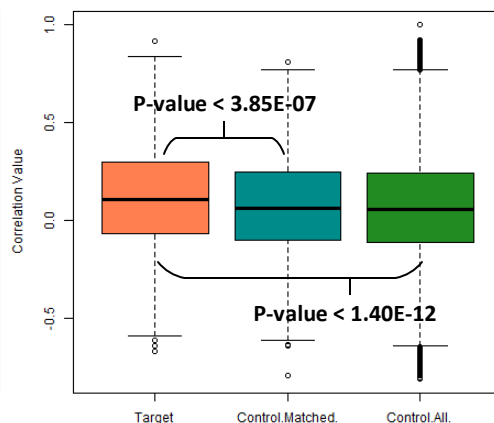

### IGF2BP2

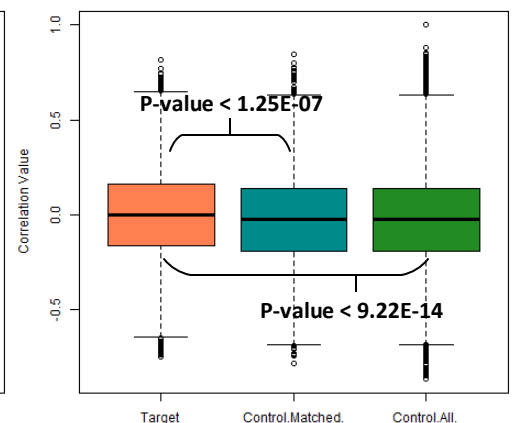

# Significantly Congruent

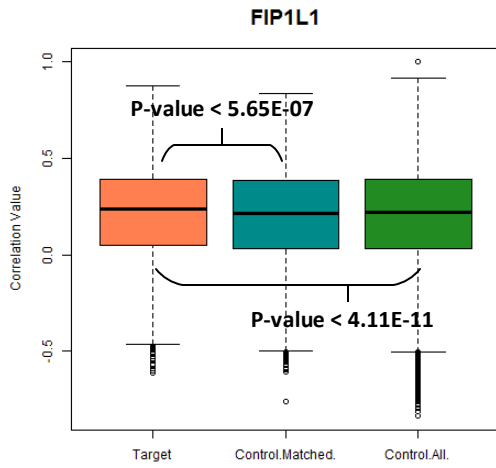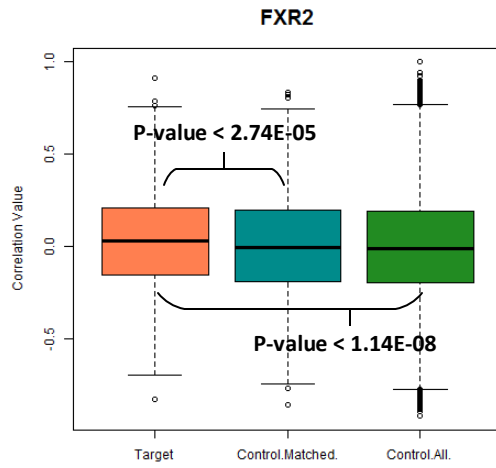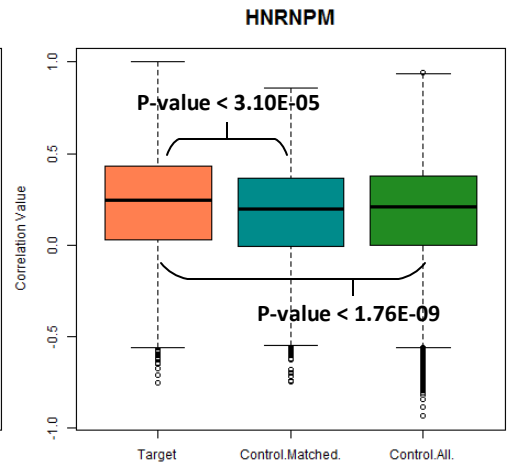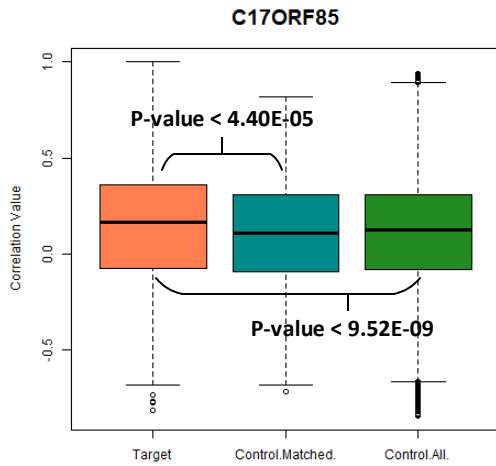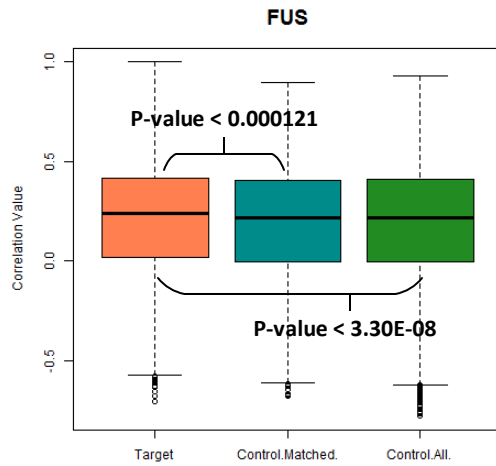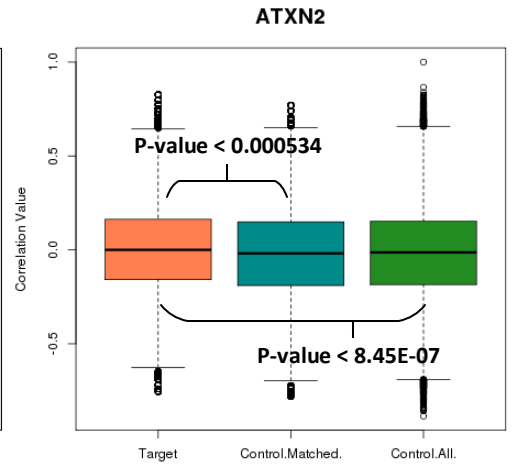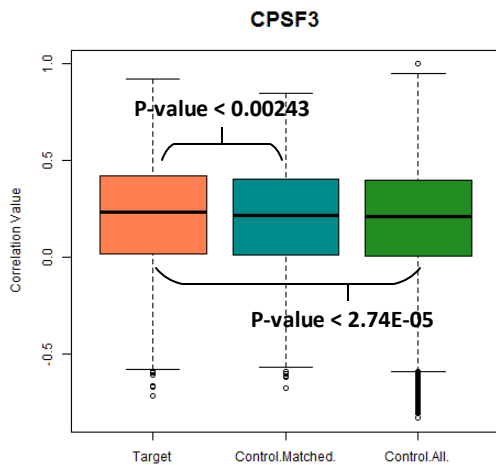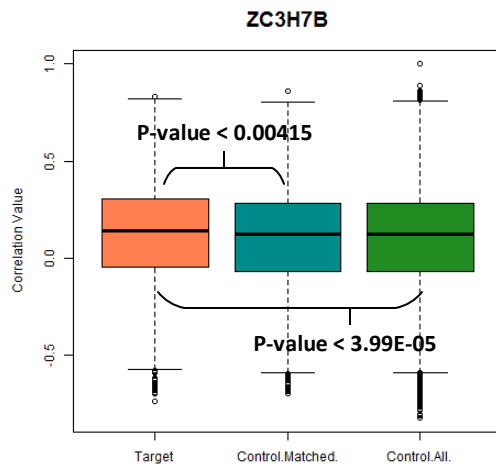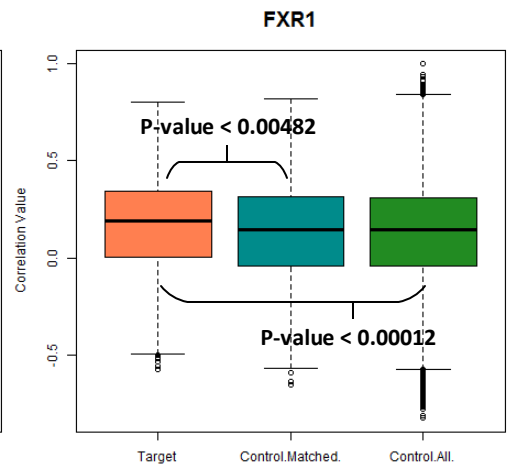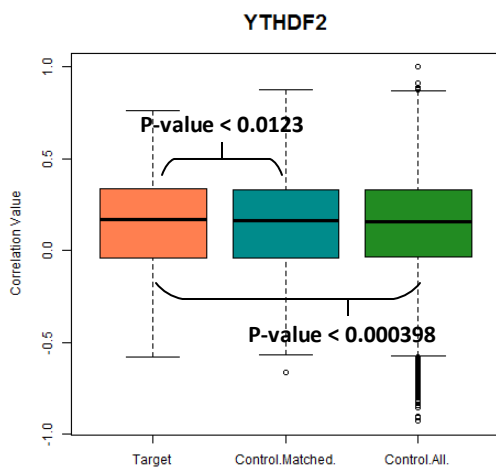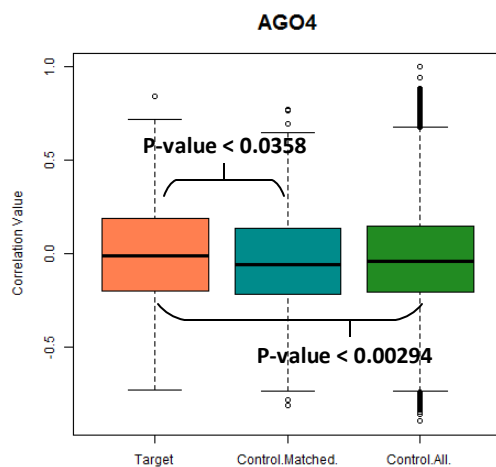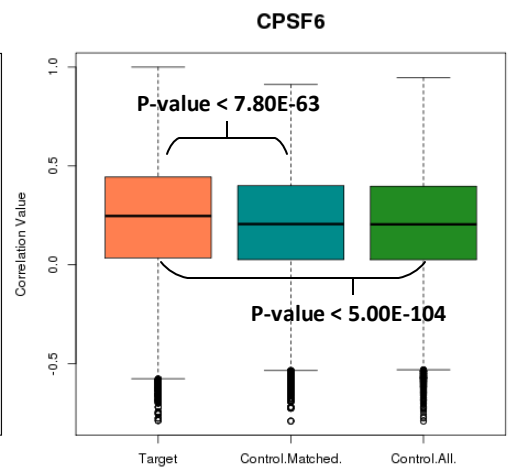

# Significantly Incongruent

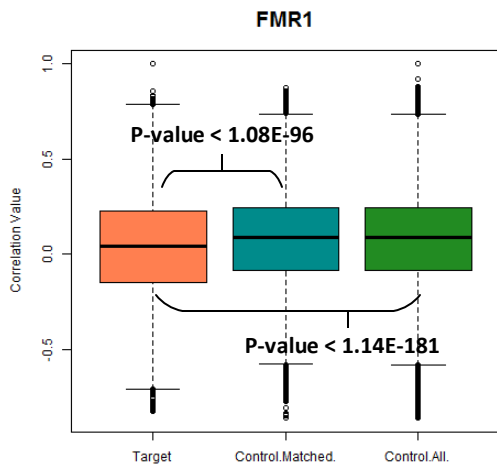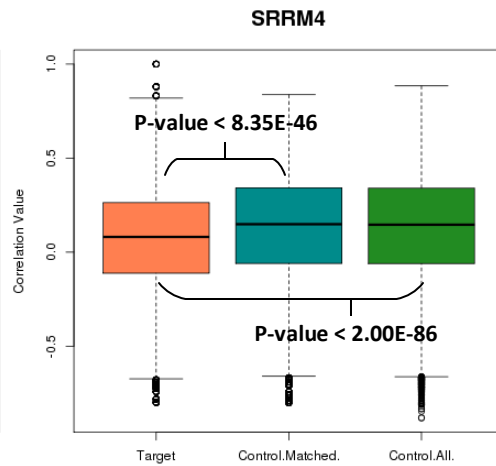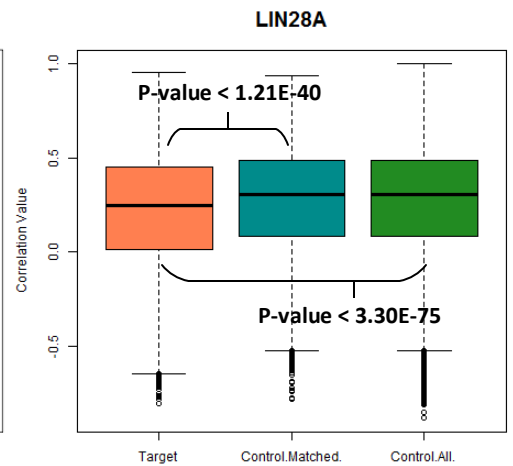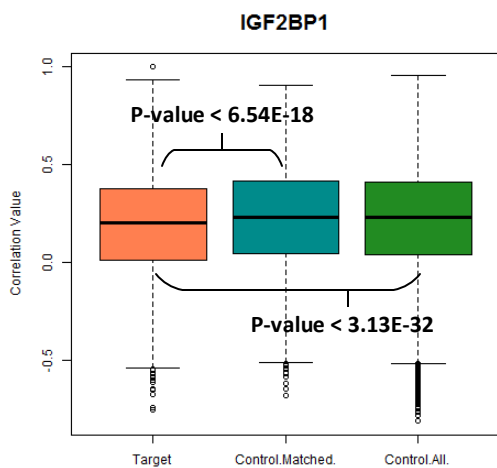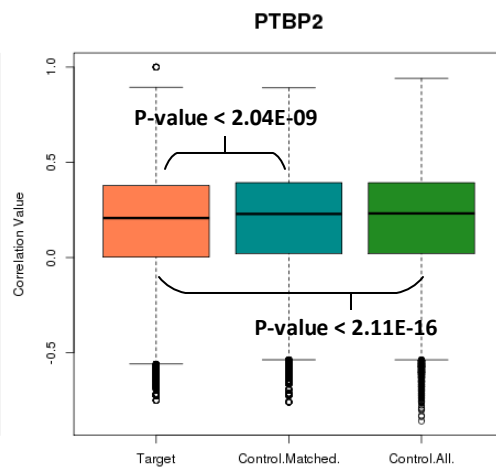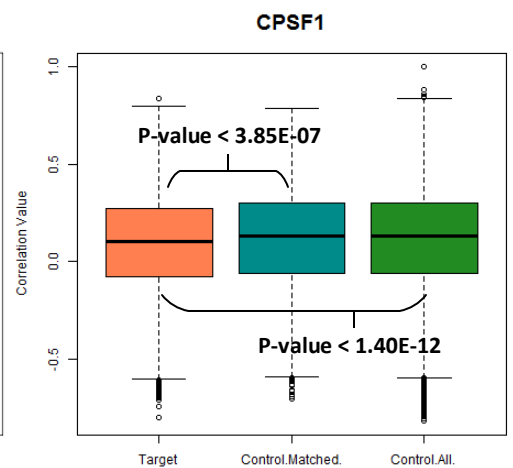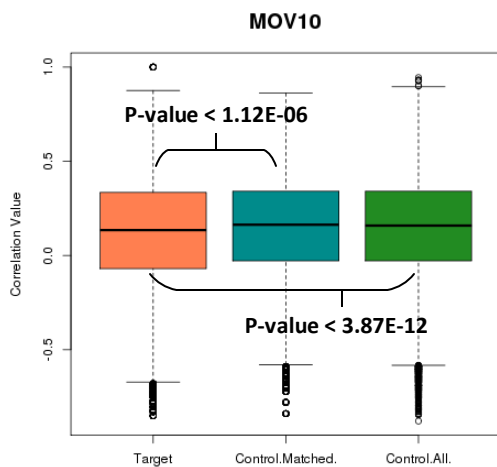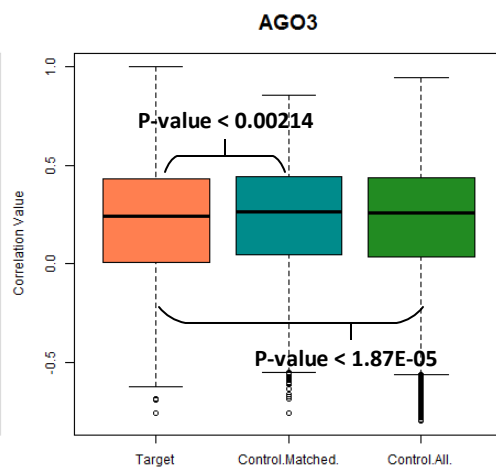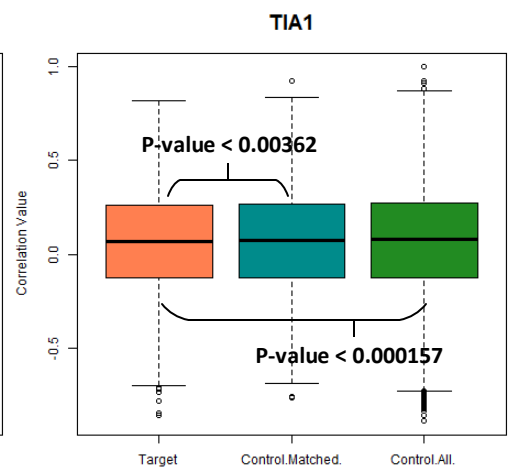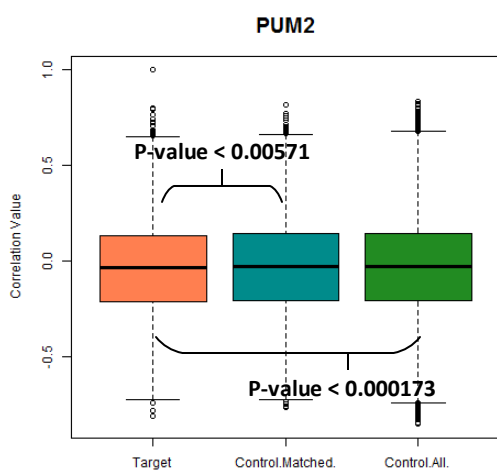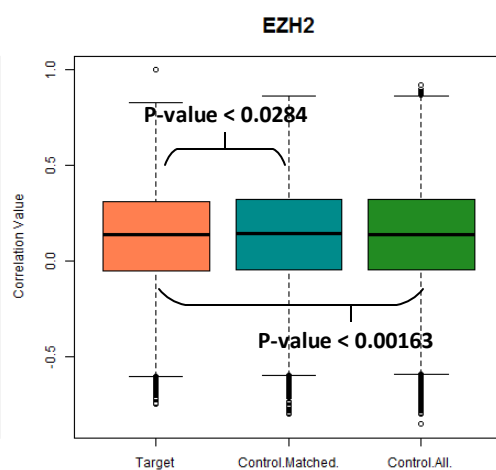

# No Significant Change

### HNRNPA1

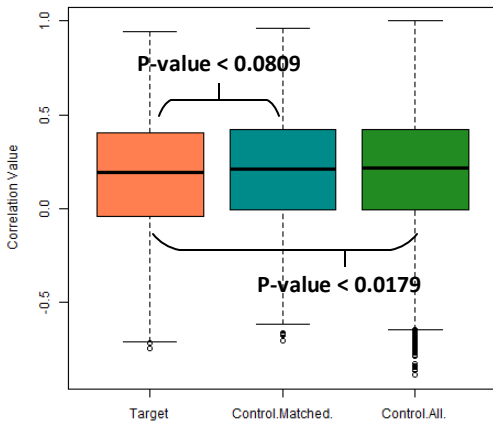

### HNRNPA2B1

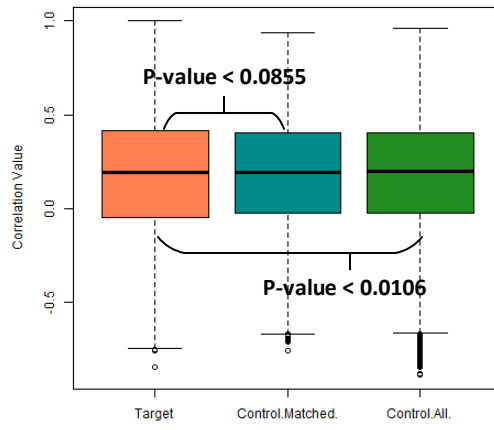

### ELAVL1

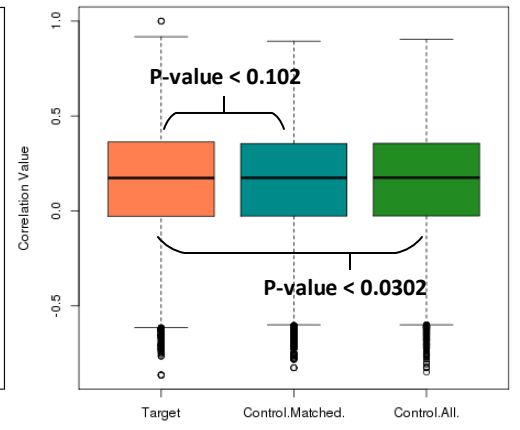

### TNRC6B

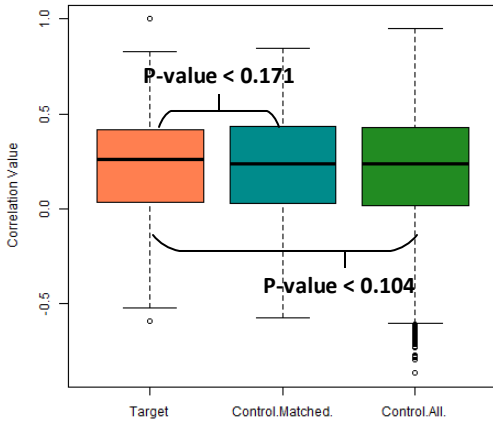

### RTCB

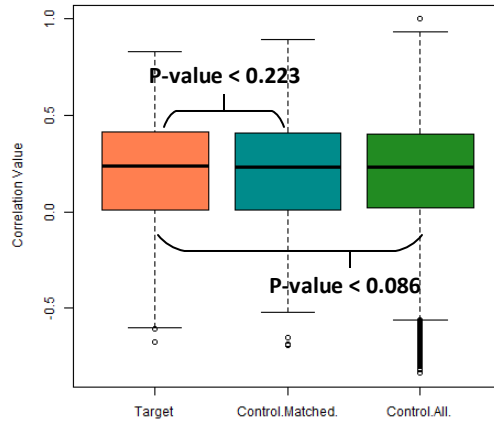

### QKI

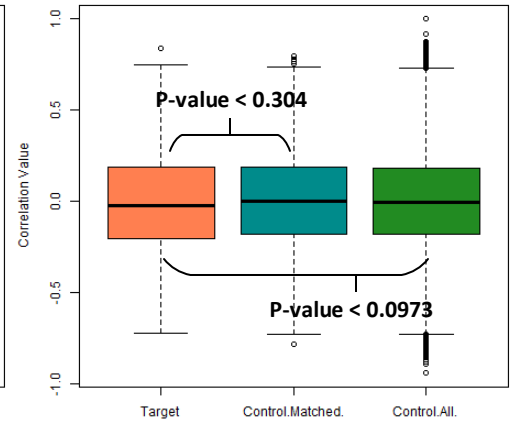

### WDR33

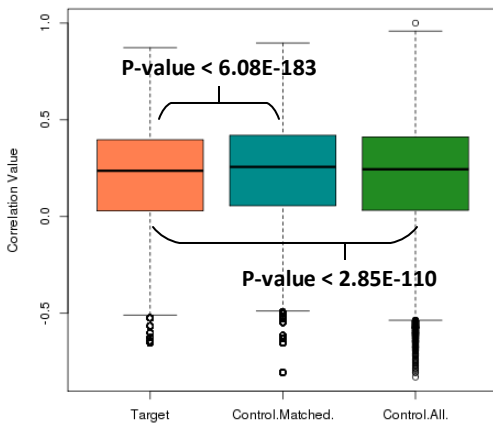

### LIN28B

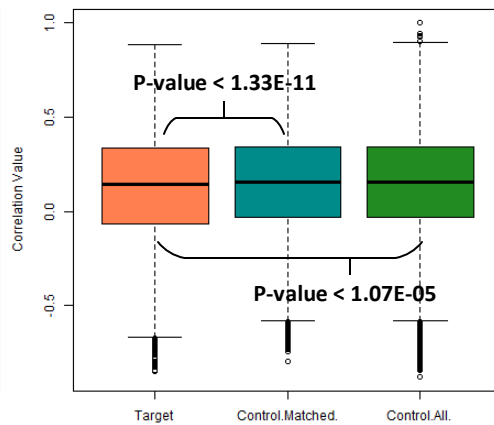

### HNRNPF

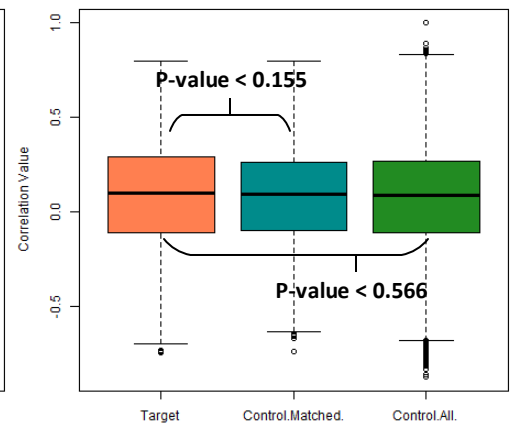

### TNRC6C

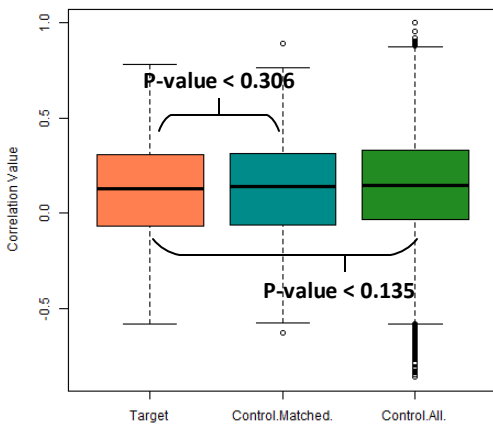

### TNRC6A

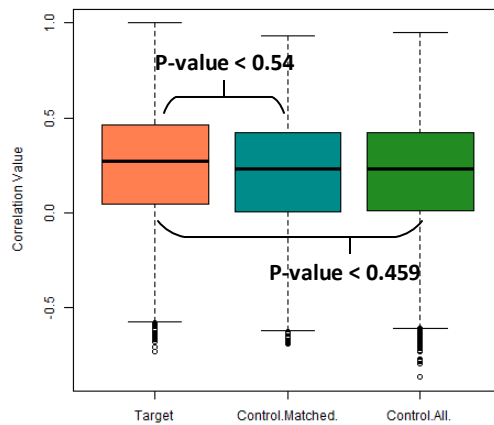

### TAF15

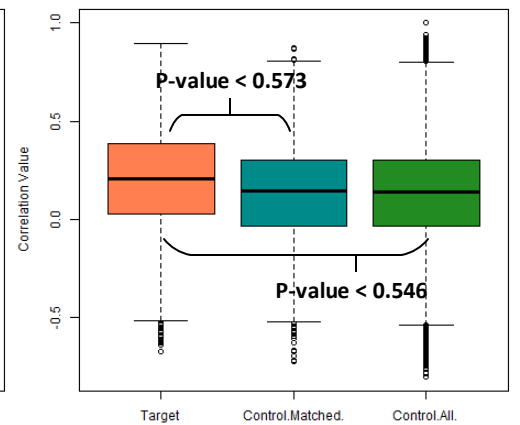



# No Significant Change

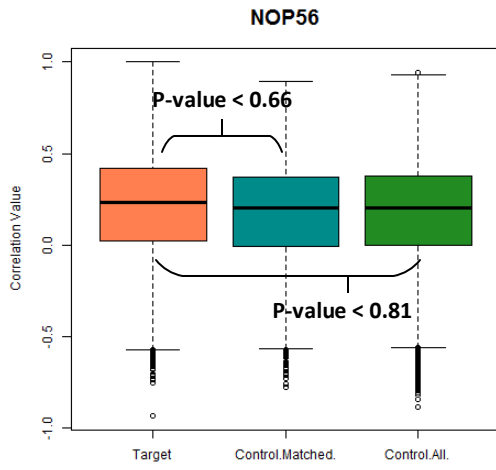

Supplementary figure 2  
Yeast  
Transcript level correlation

# Significantly Congruent

YJL080C

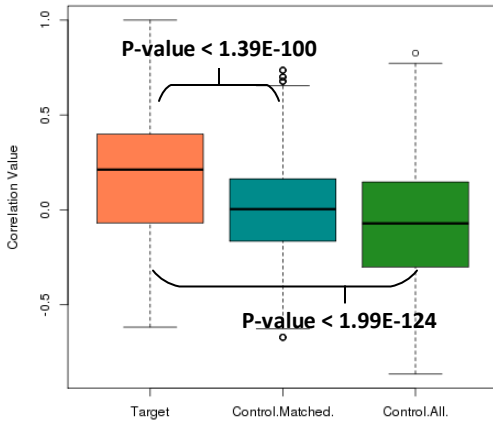

YOR198C

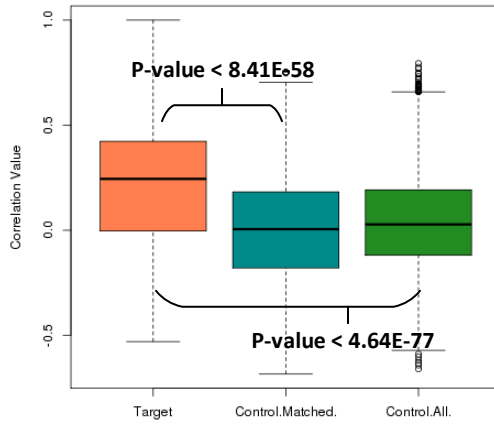

YGL014W

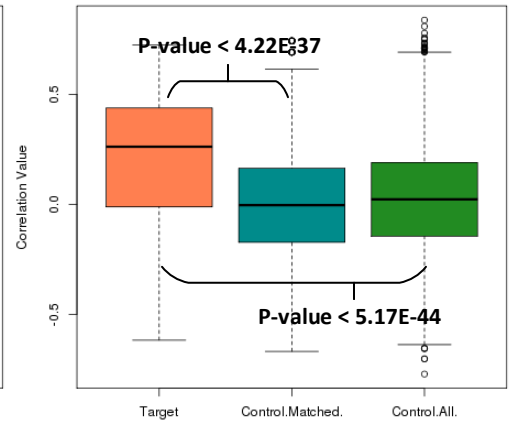

YGL178W

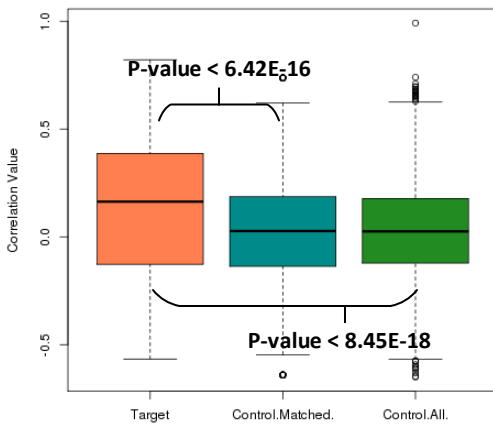

YER165W

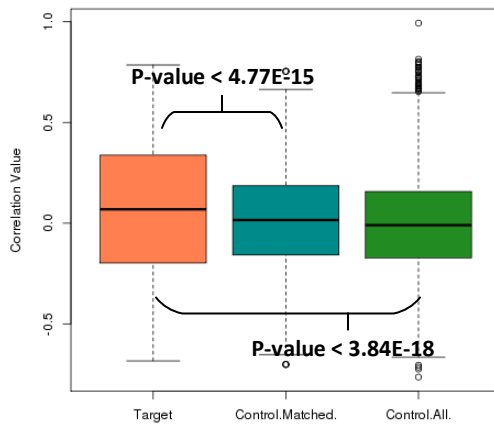

YCL011C

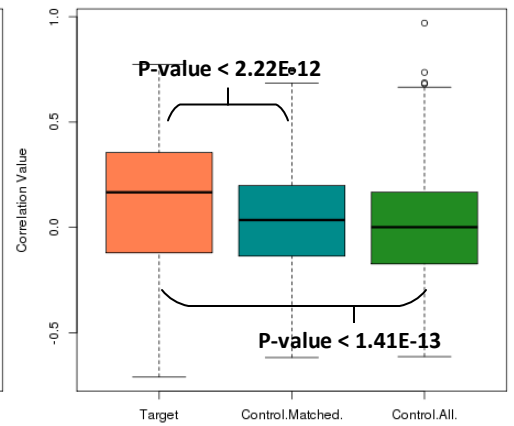

YNL255C

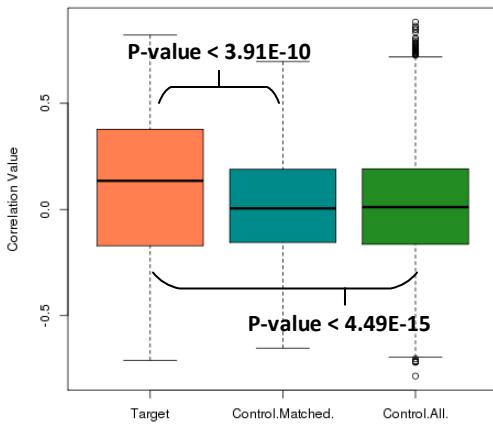

YGR159C

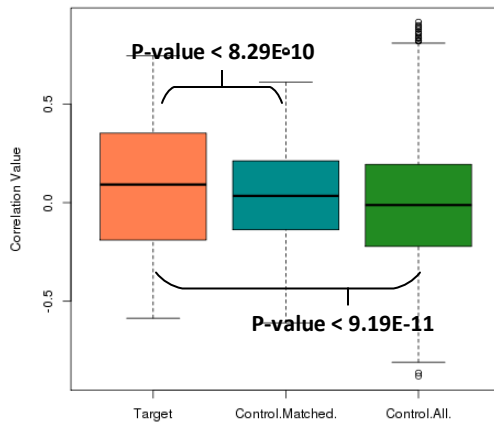

YIL160C

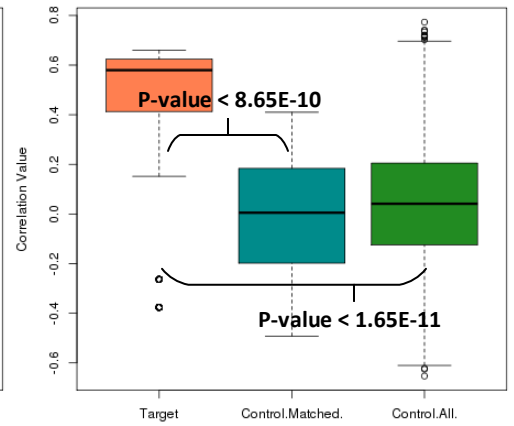

YJR110W

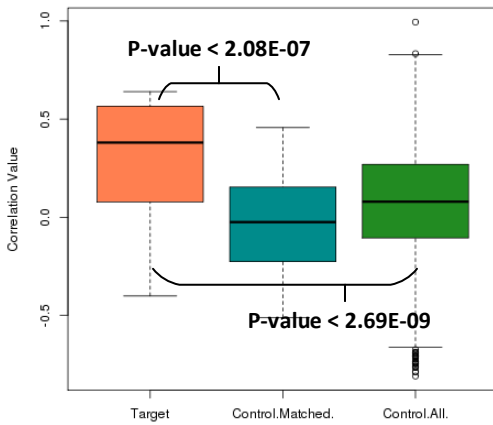

YLR244C

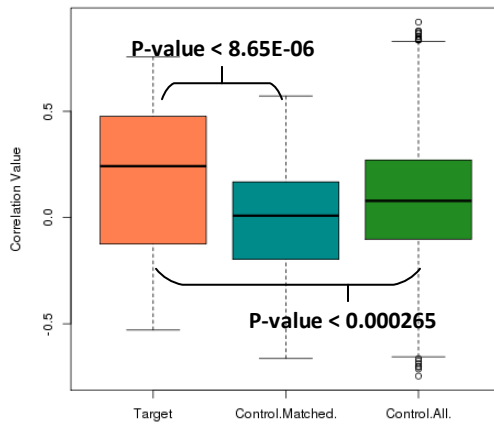

YPR042C

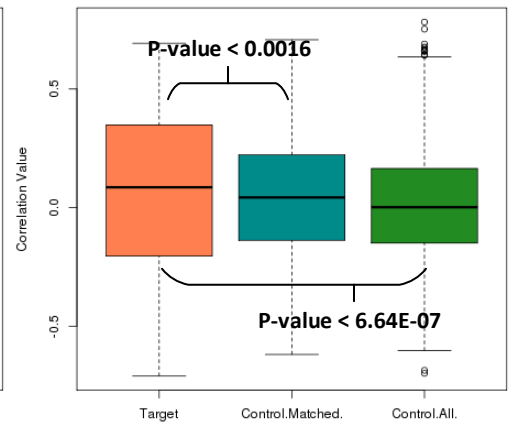

# Significantly Congruent

YJR091C

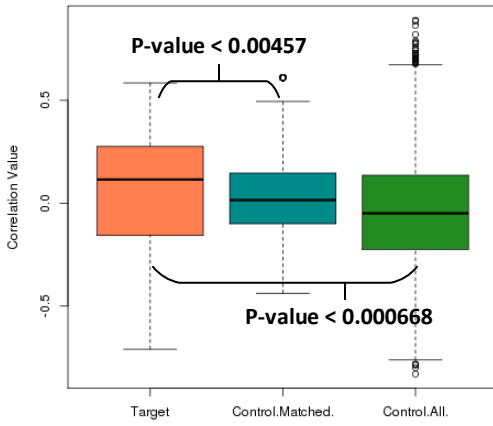

YOR362C

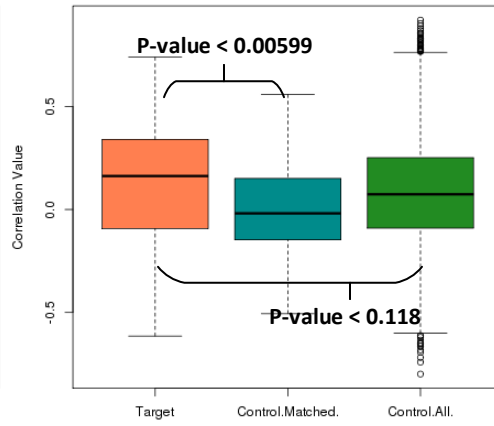

YBL051C

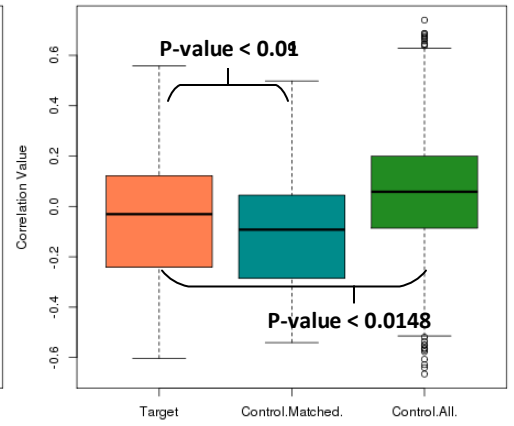

YER151C

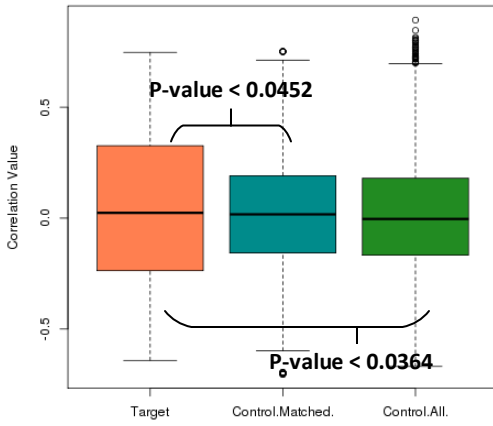

YDR293C

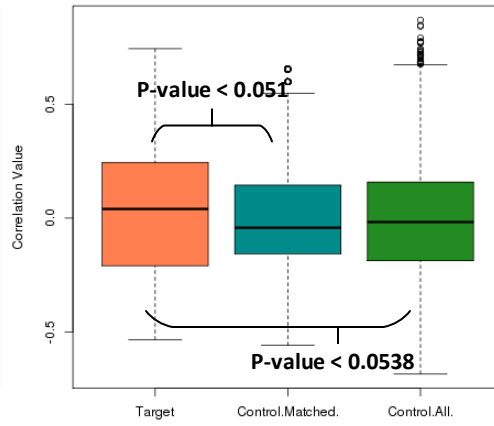

# Significantly Incongruent

YBR222C

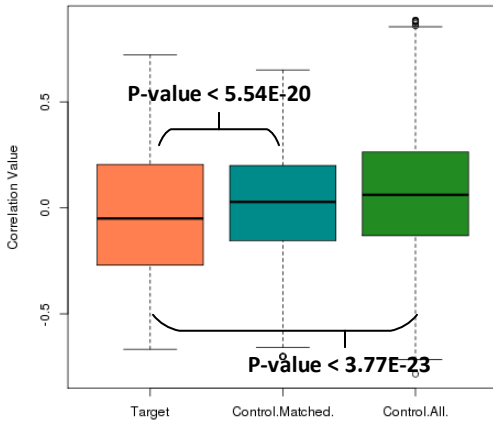

YIR034C

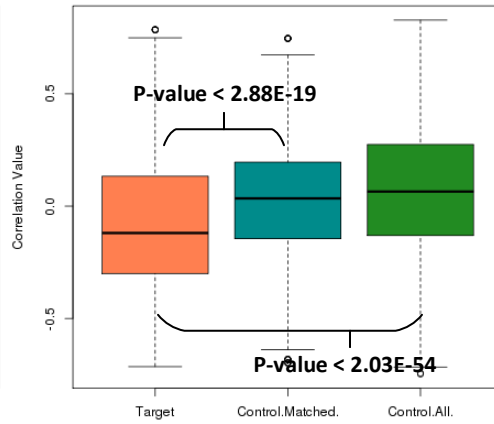

YBL032W

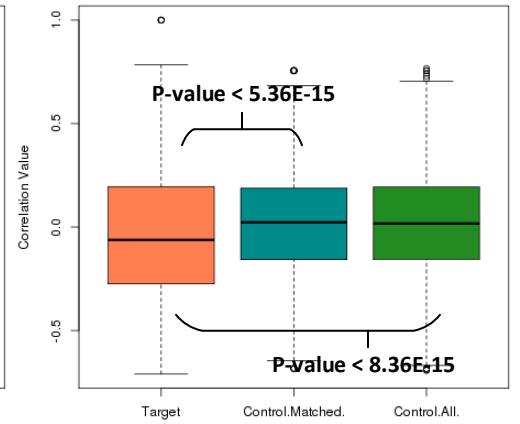

YLL013C

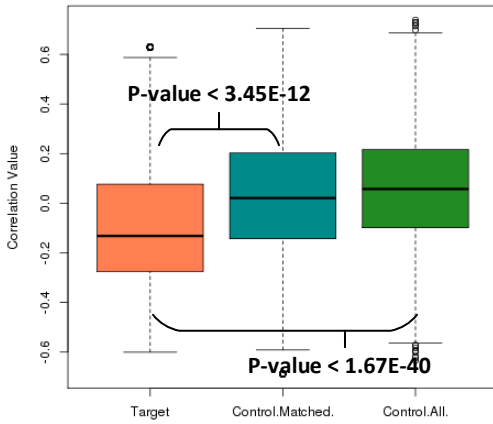

YHR209W

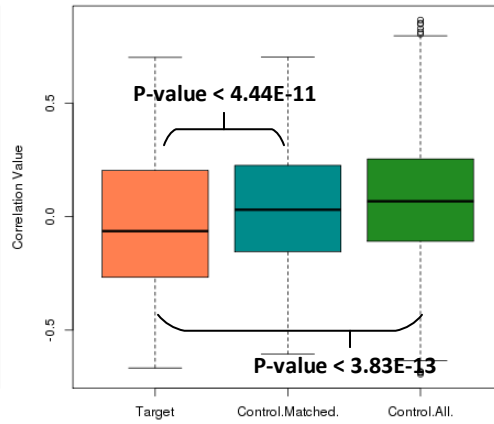

YOR094W

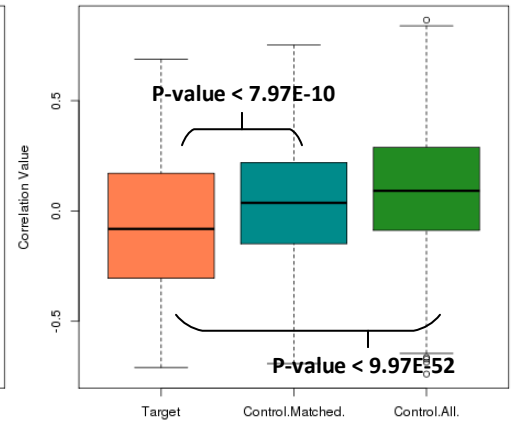

YIL062C

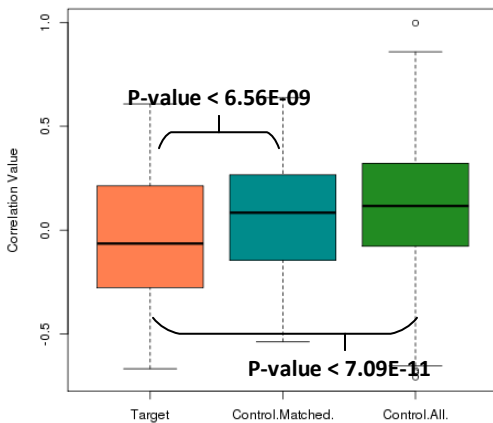

YER072W

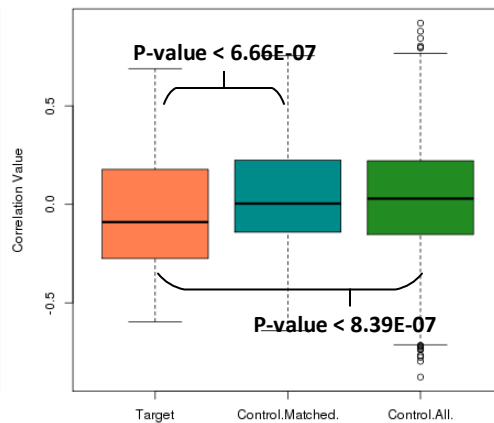

YDR432W

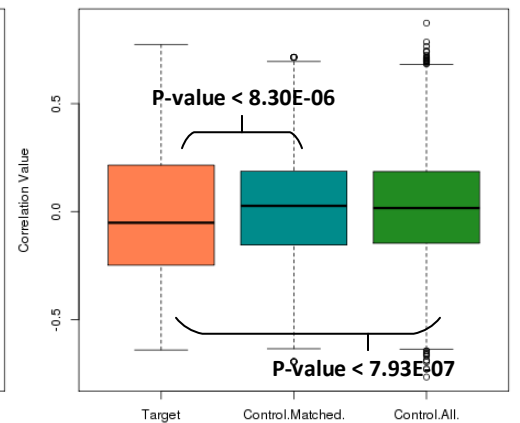

YPR129W

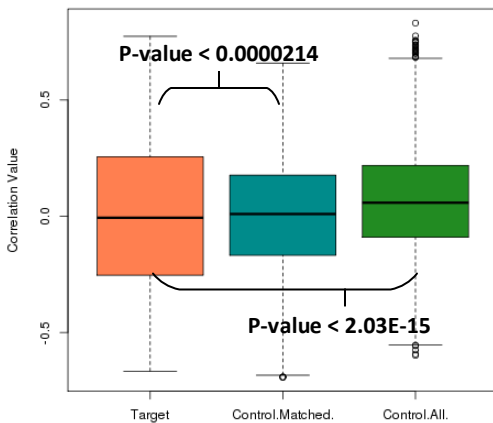

YNL016W

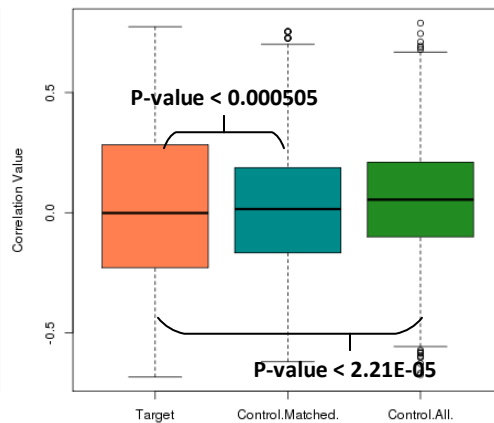

YPL178W

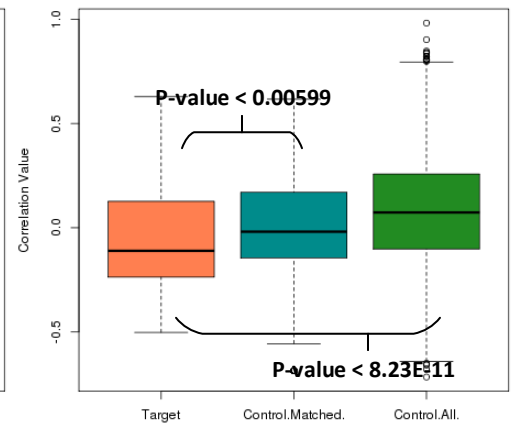

# Significantly Incongruent

YLR116W

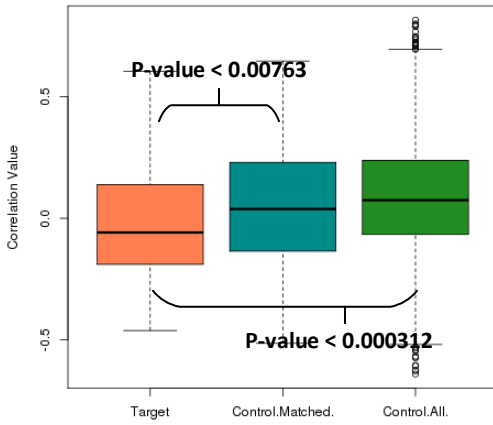

YBR072W

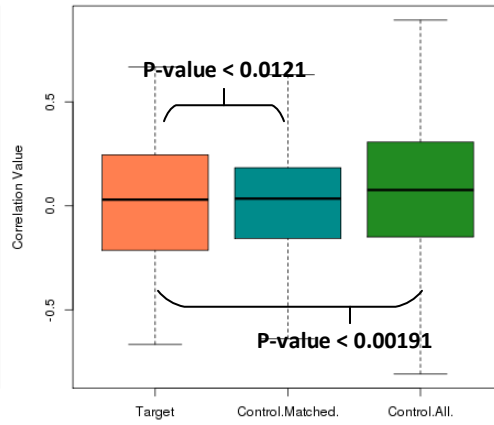

YOR120W

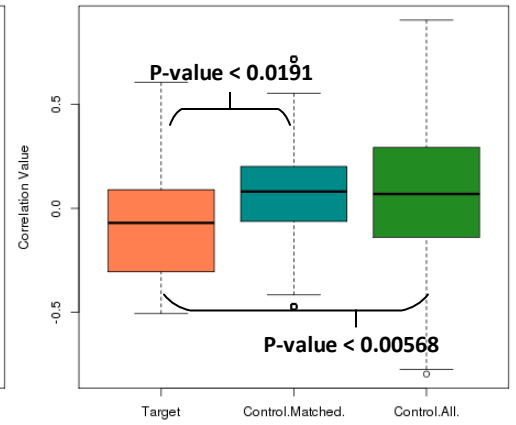

YGR192C

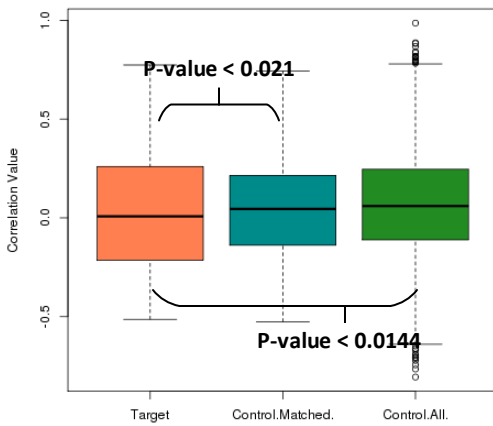

YOR386W

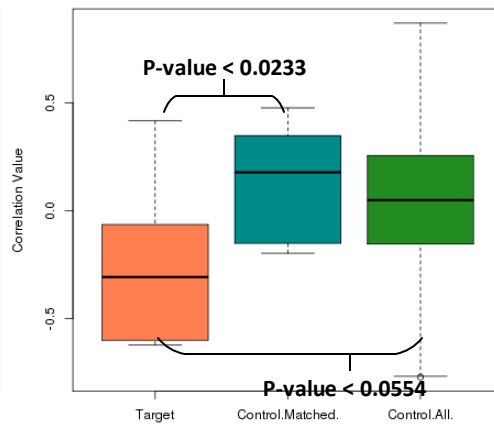

YOR027W

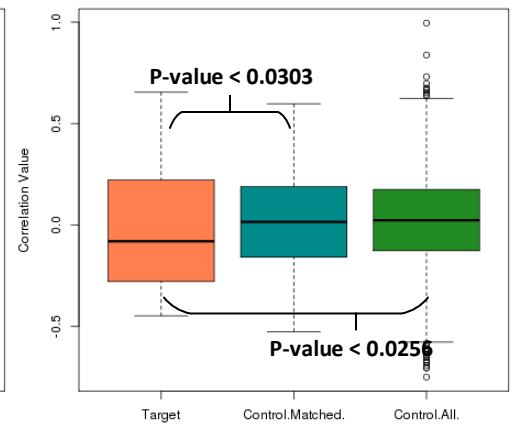

YDR538W

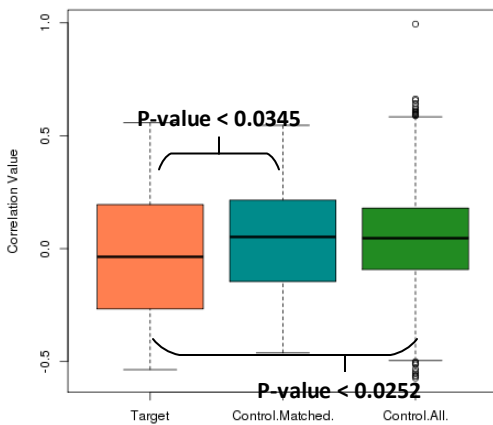

YOR236W

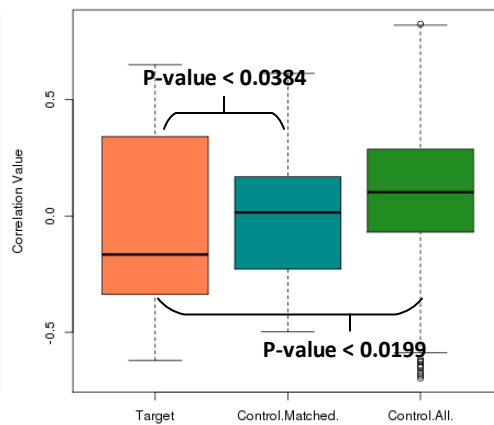

YOR141C

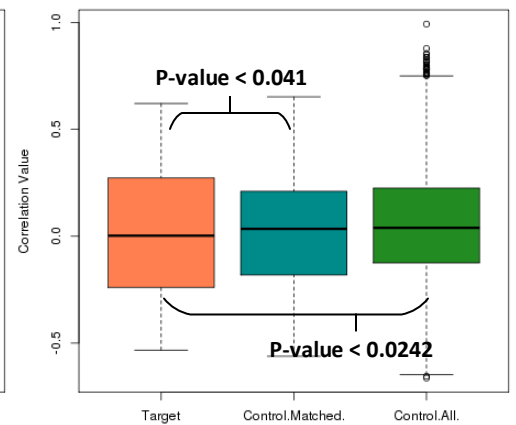

YBL078C

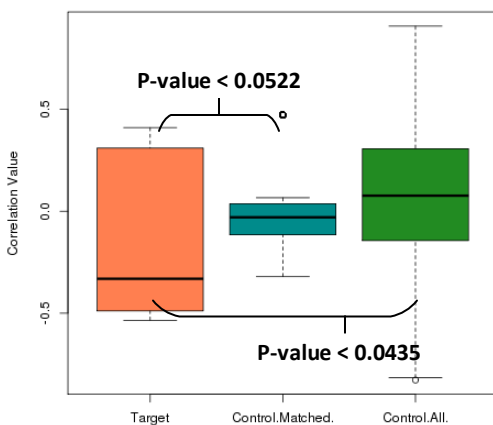

YLR197W

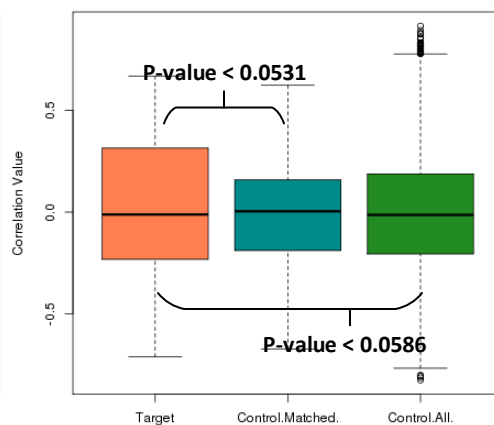

YNL251C

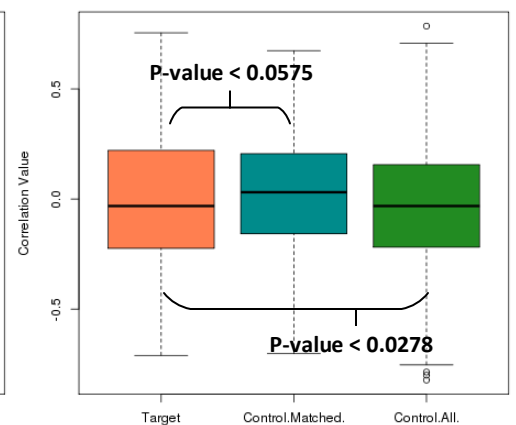

# No Significant Change

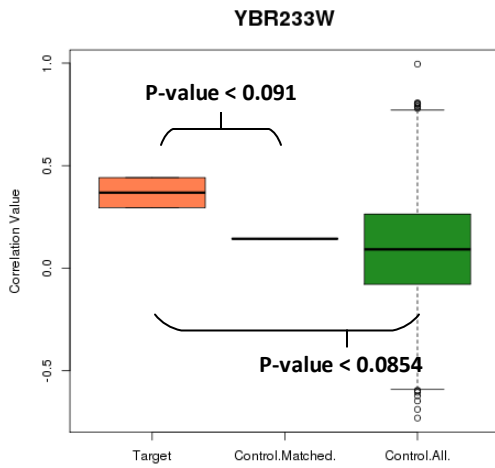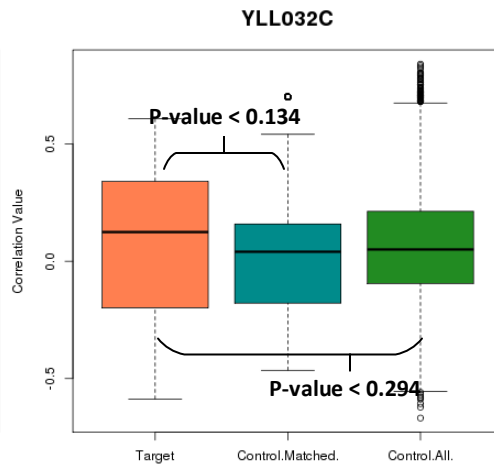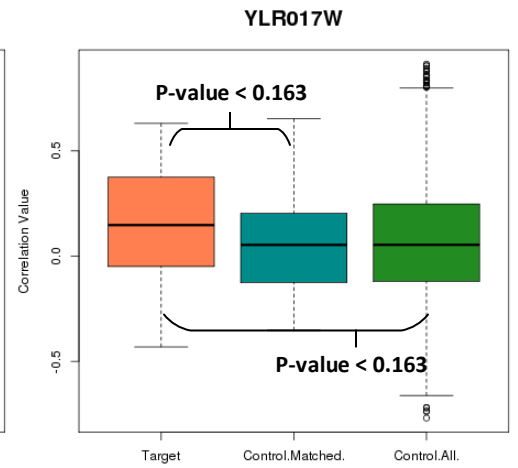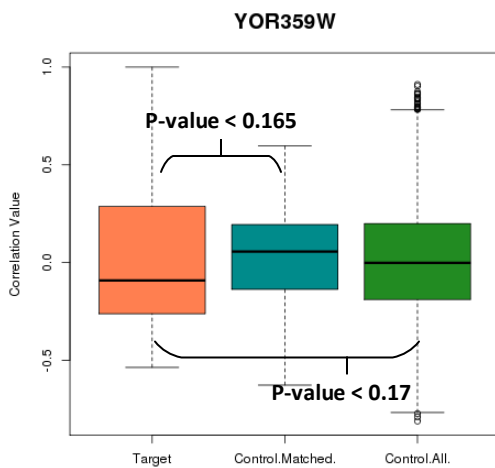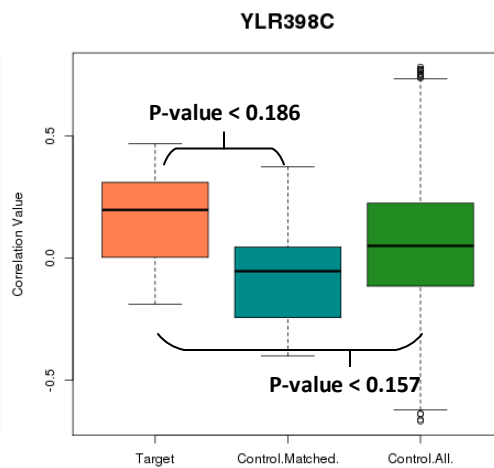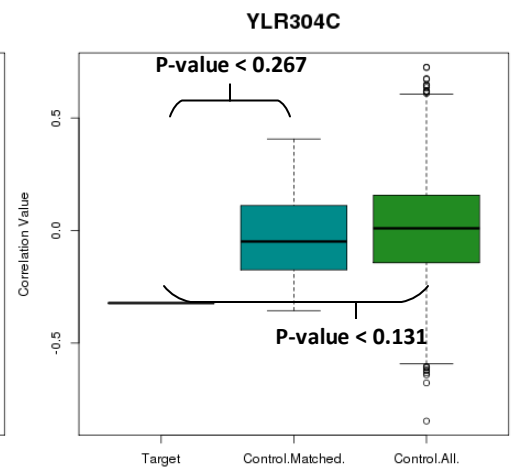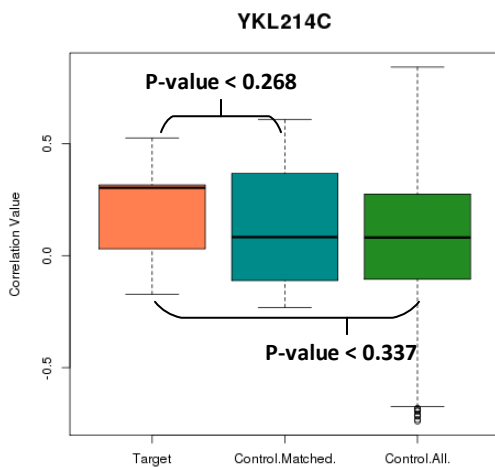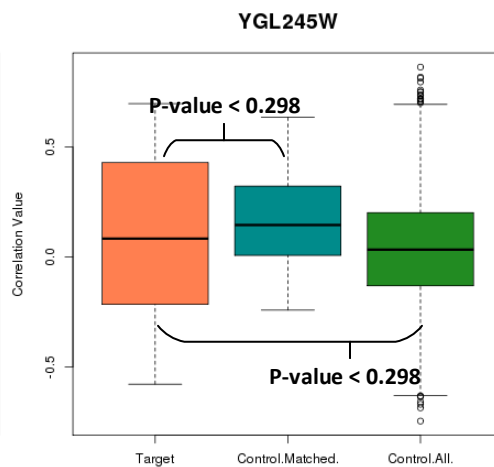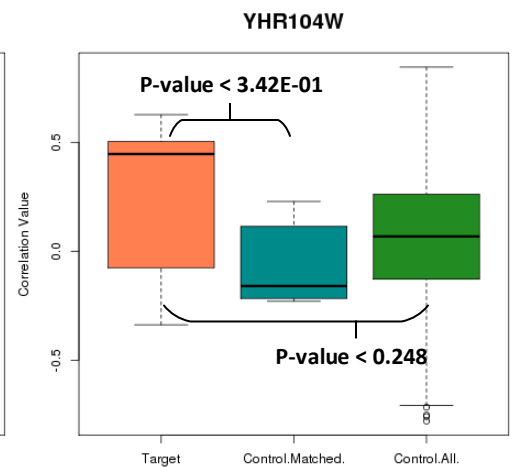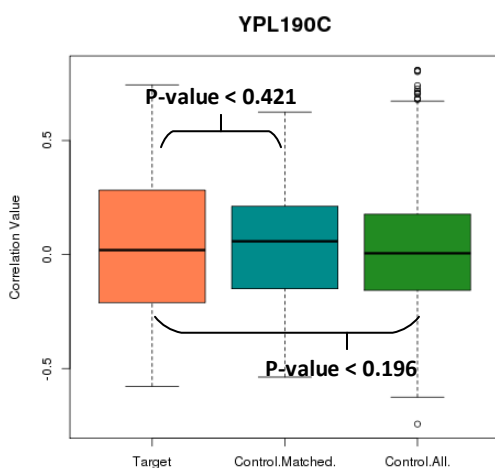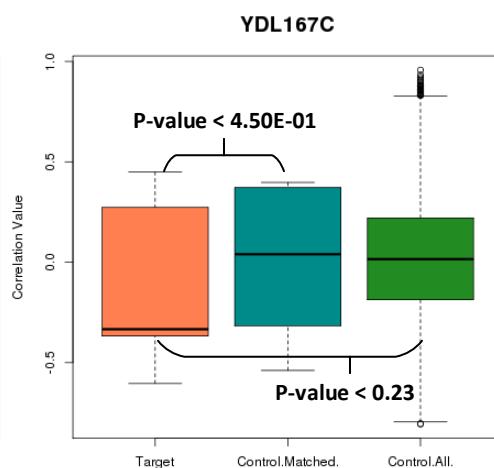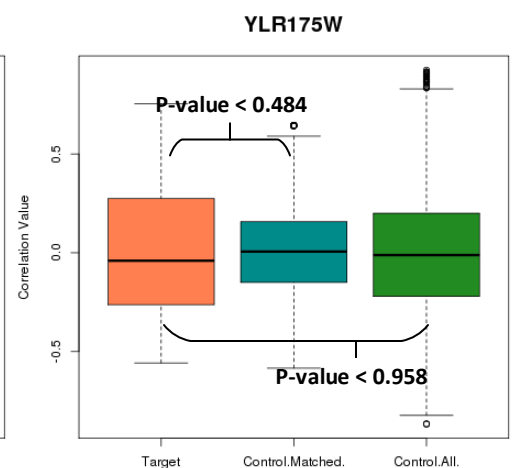

# No Significant Change

YNL037C

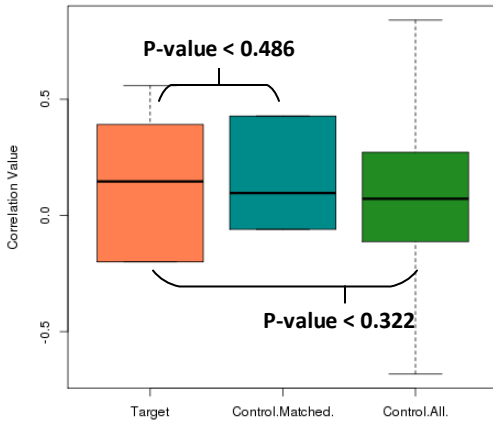

YNL004W

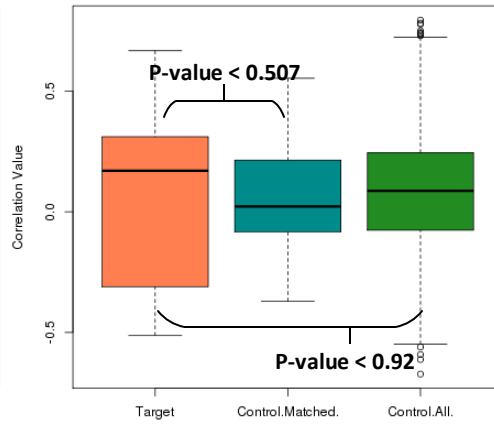

YKL130C

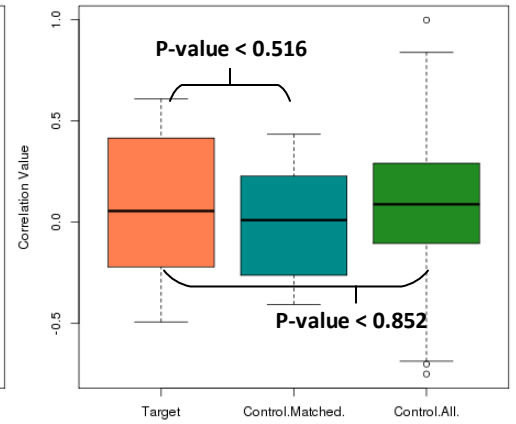

YGL122C

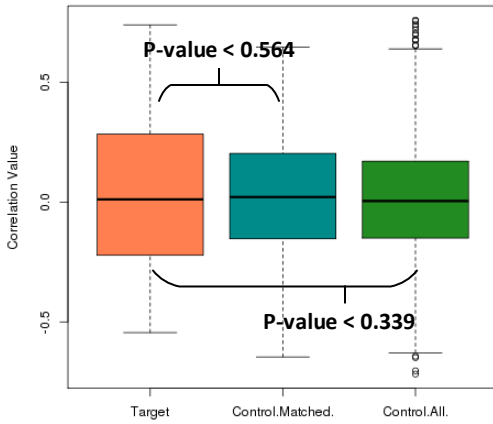

YIR001C

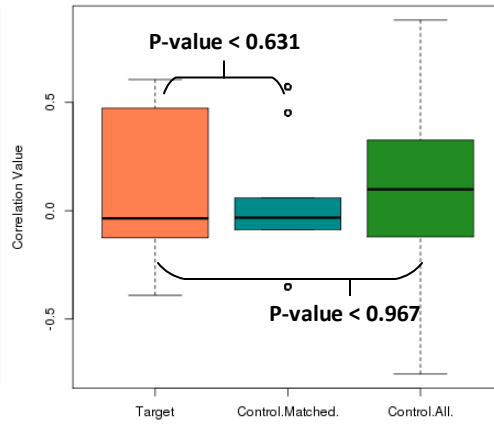

YDL078C

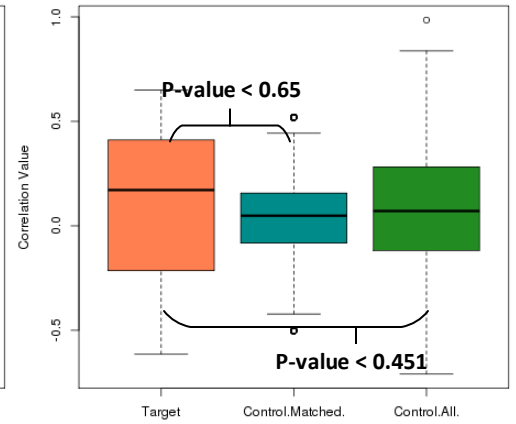

YNL239W

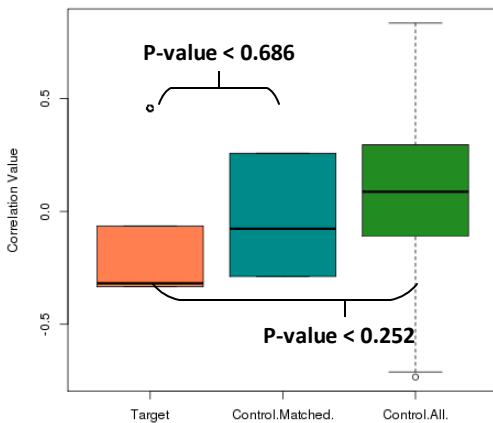

YMR205C

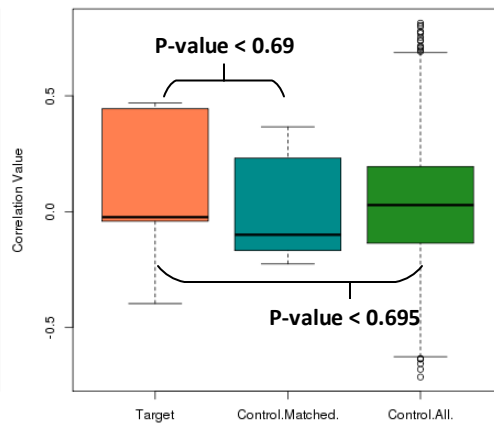

YPL184C

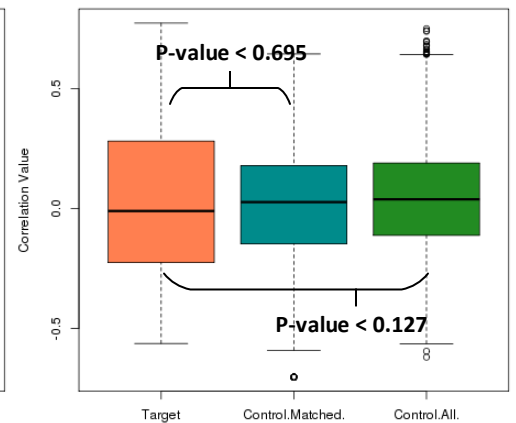

YML117W

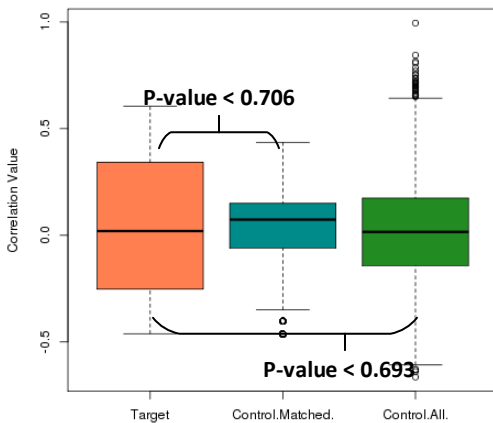

YPR149W

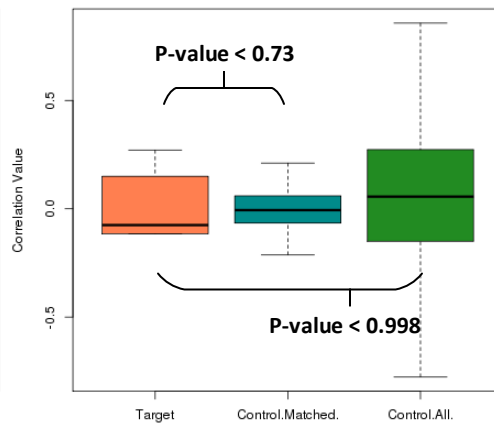

YFL023W

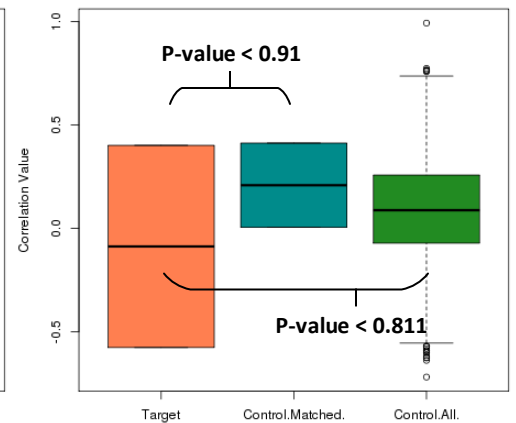



Supplementary figure 3  
Protein level correlation

# Significantly Congruent

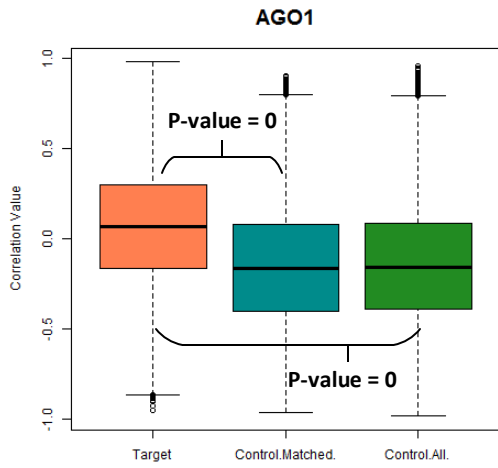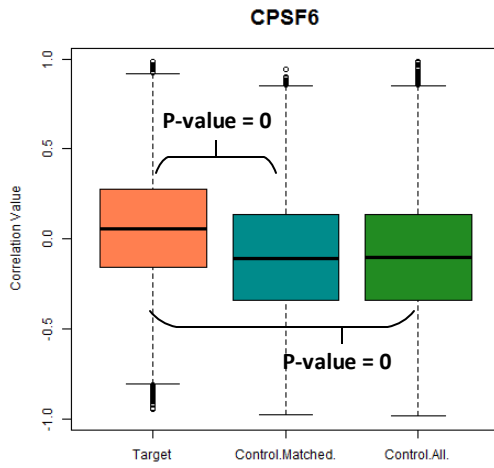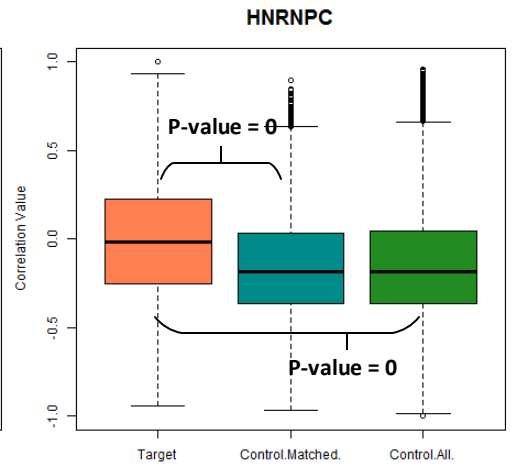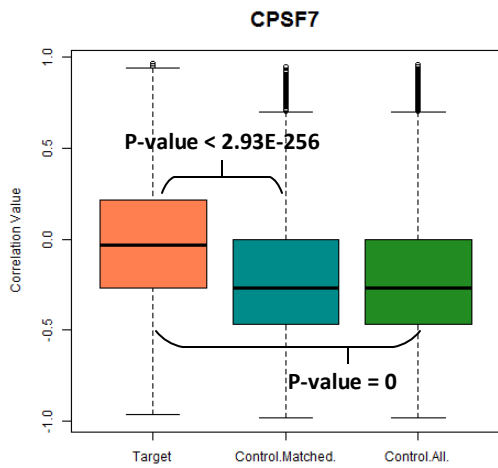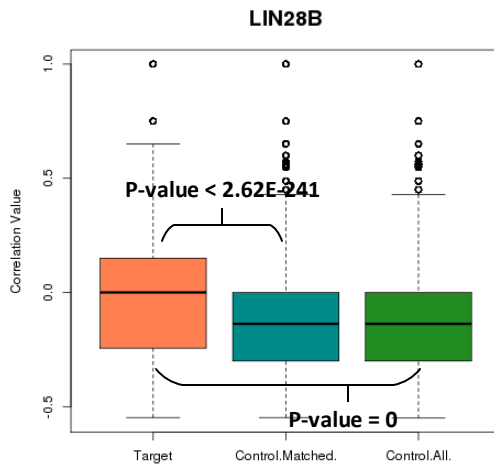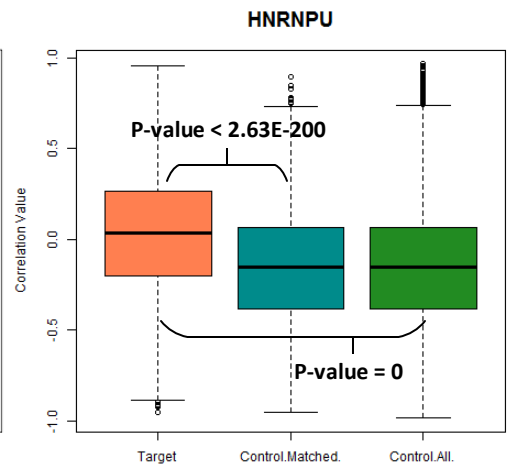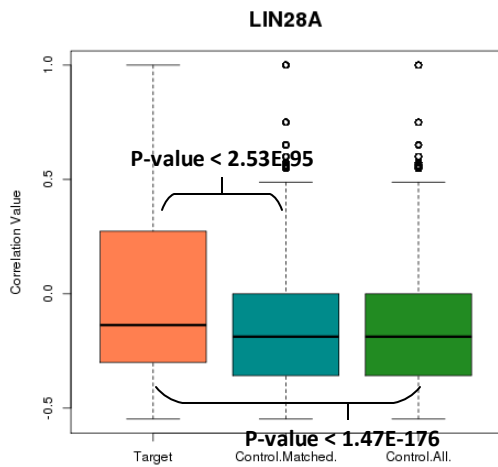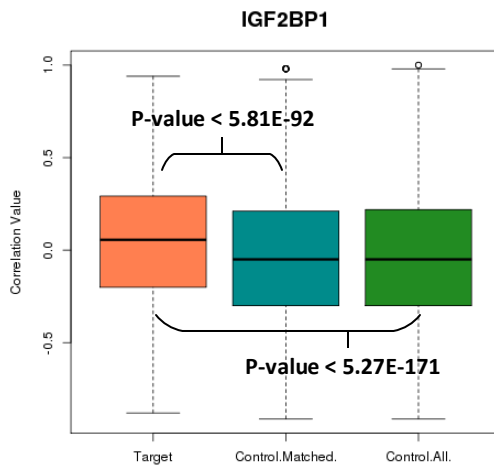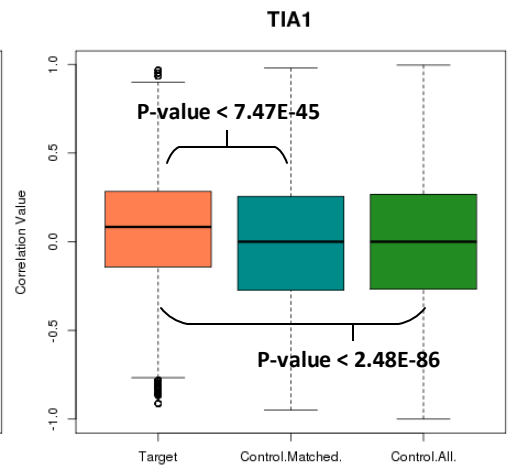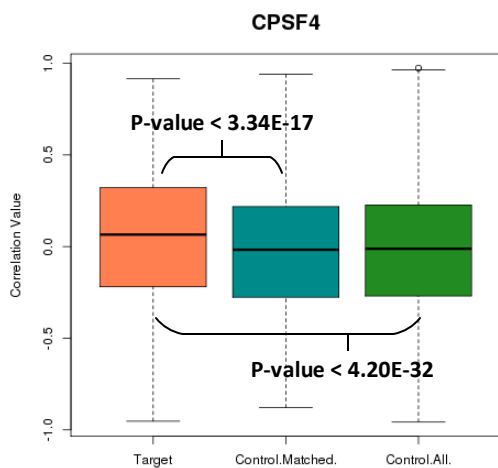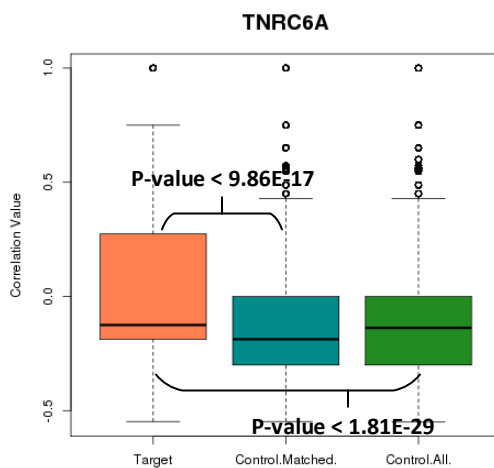

# Significantly Incongruent

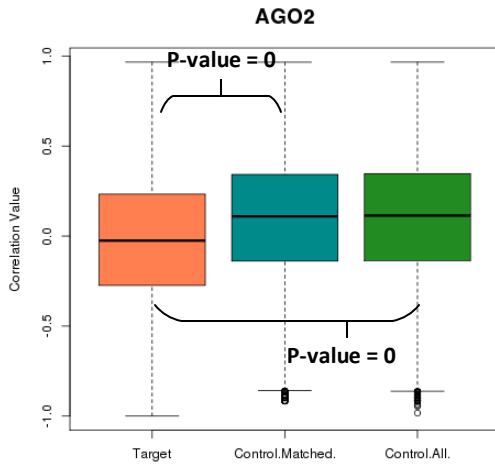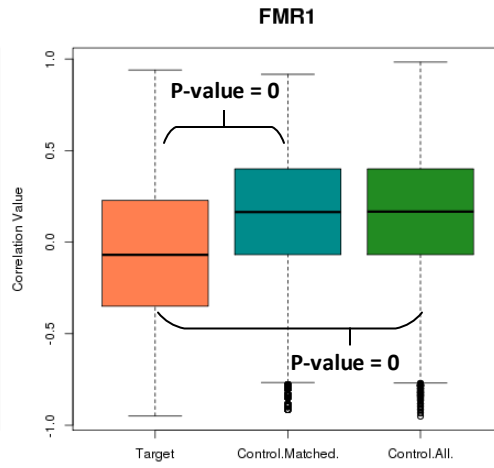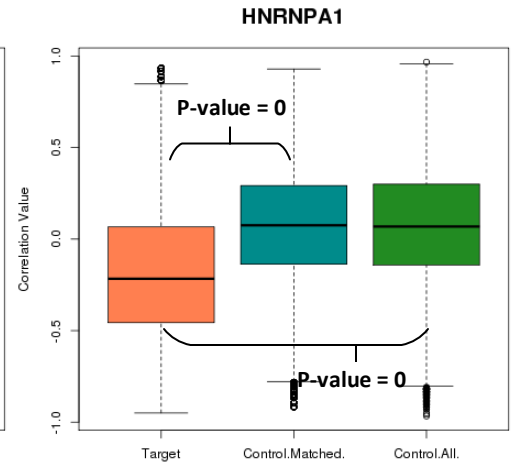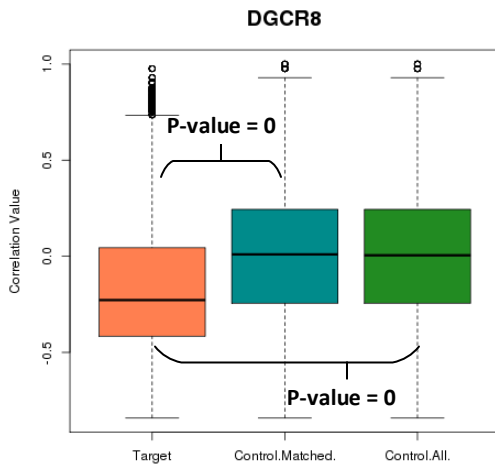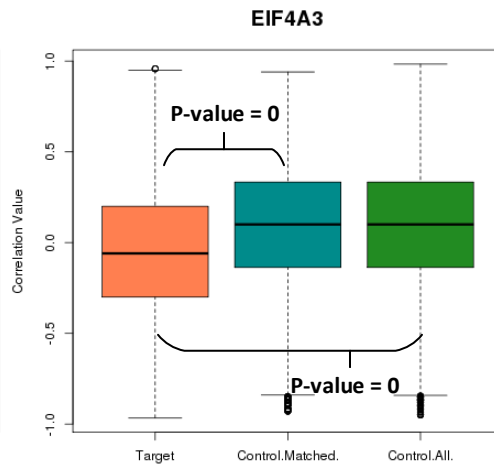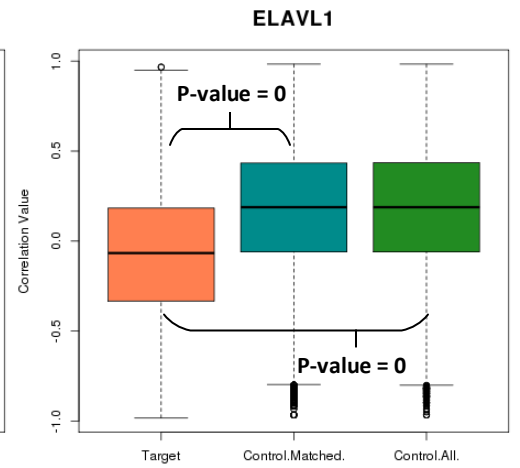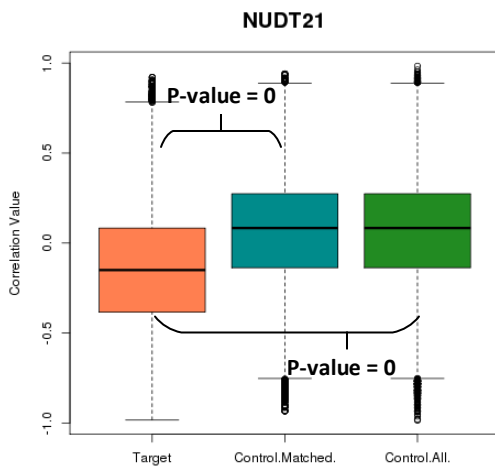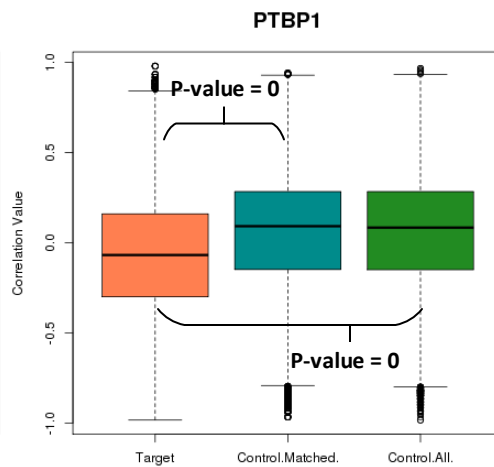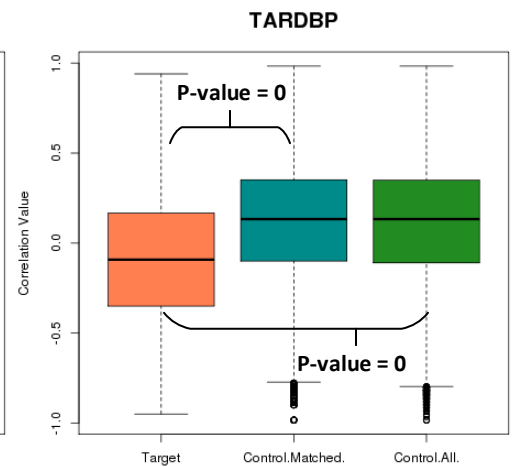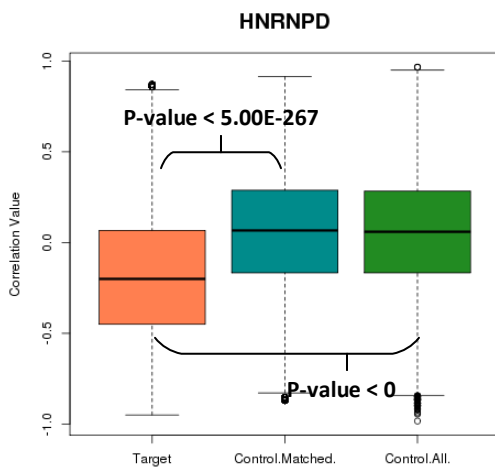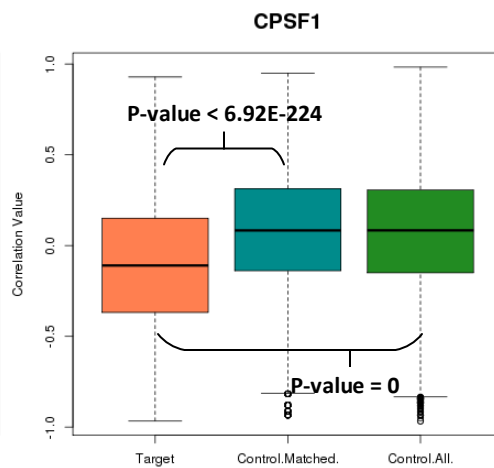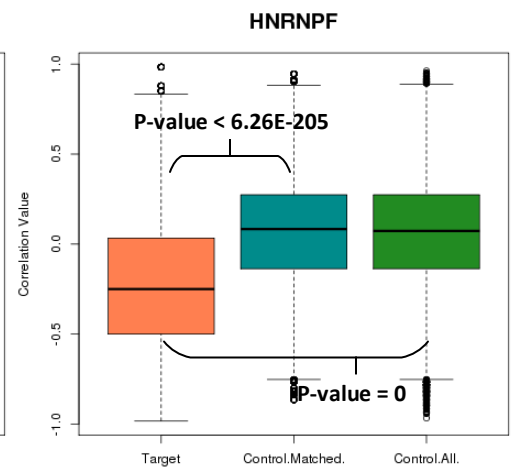

# Significantly Incongruent

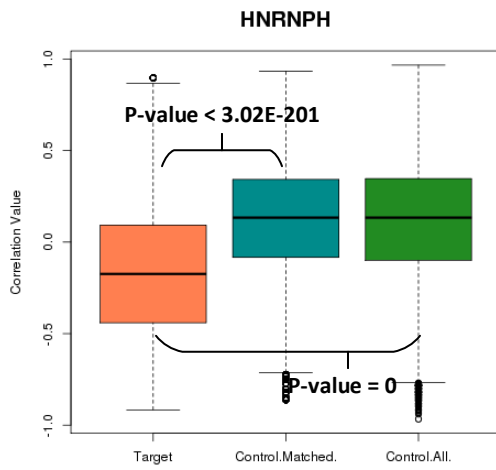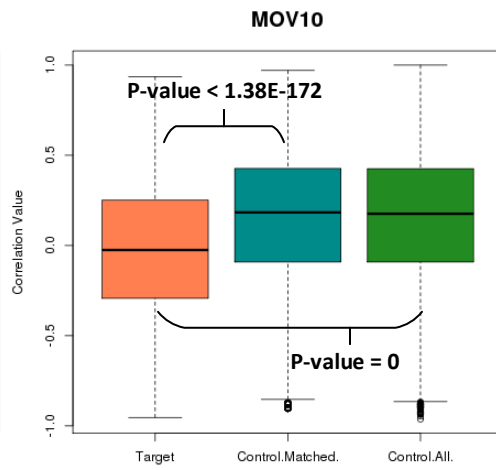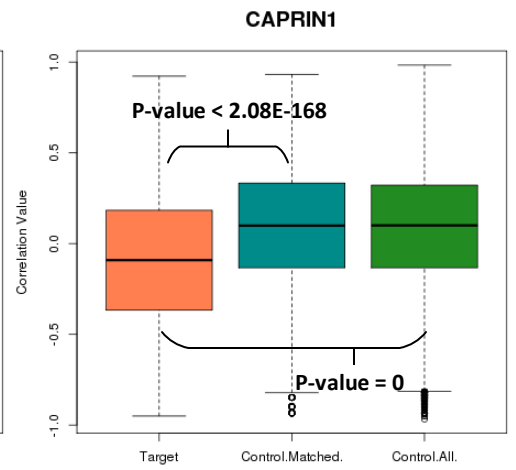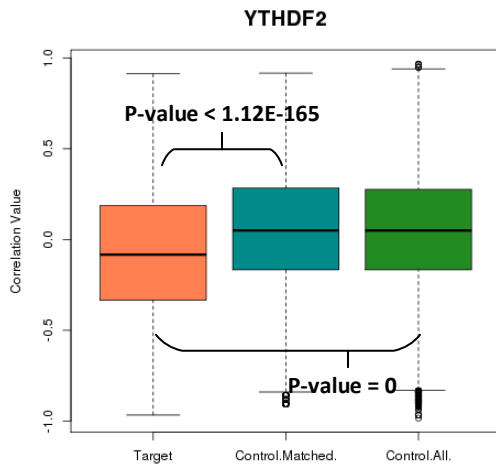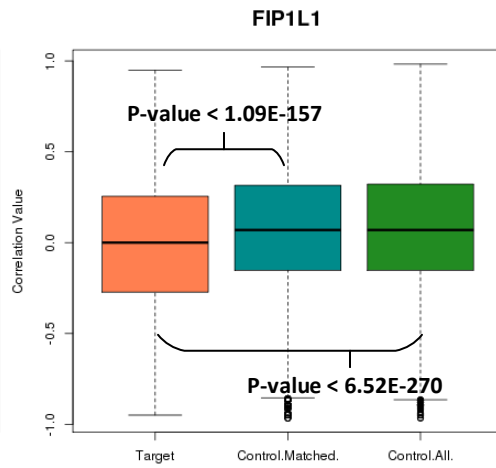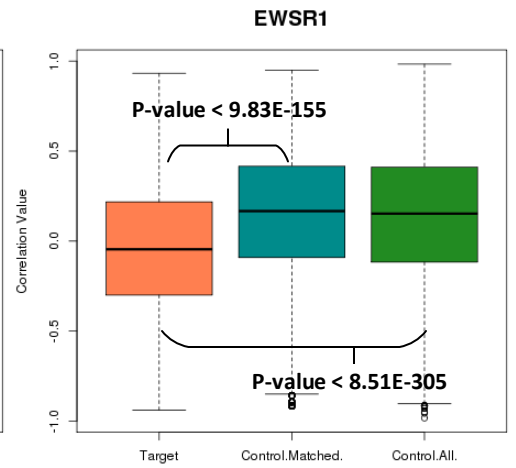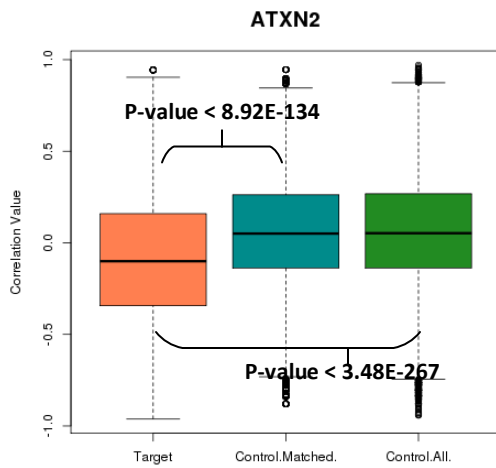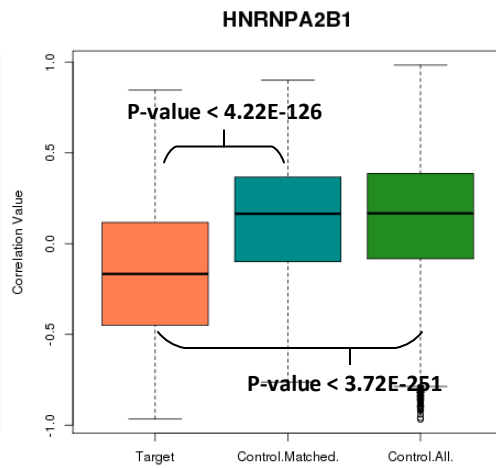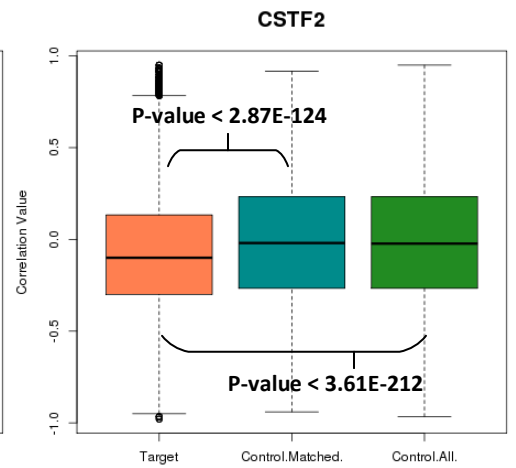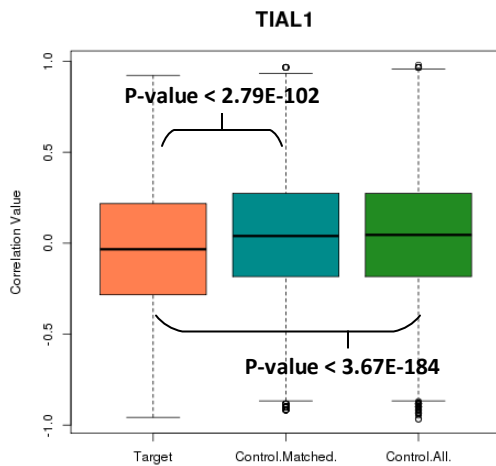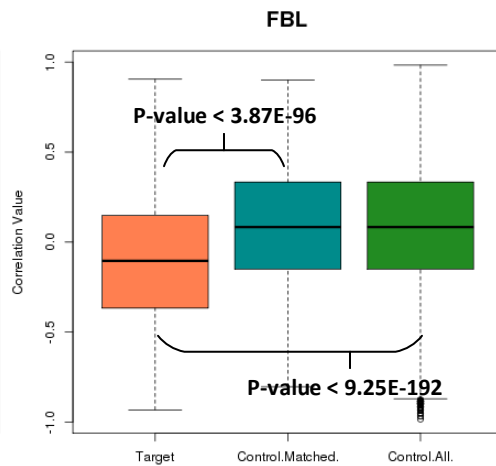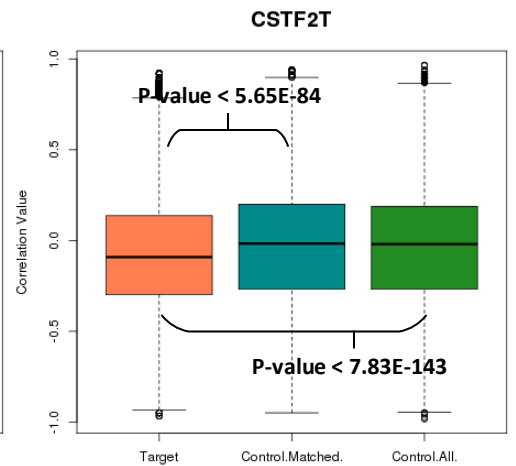

# Significantly Incongruent

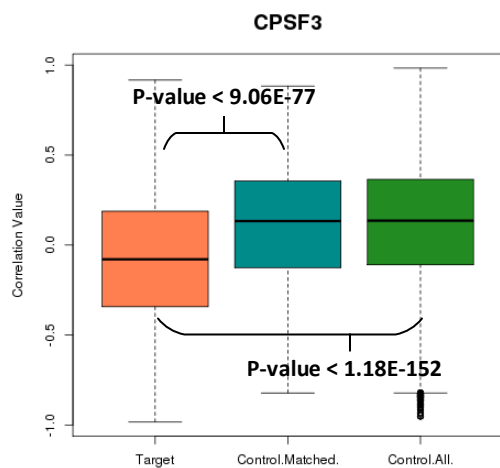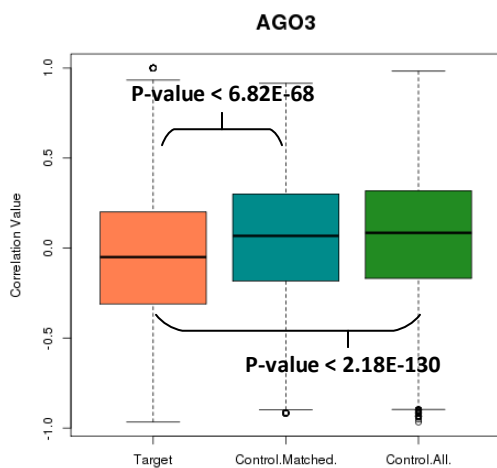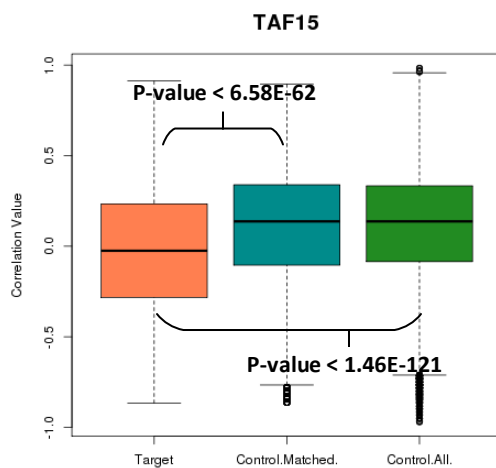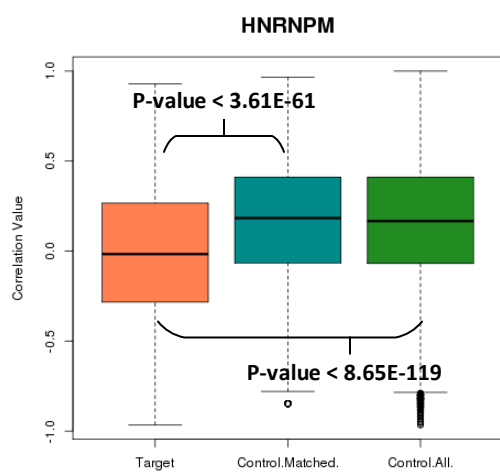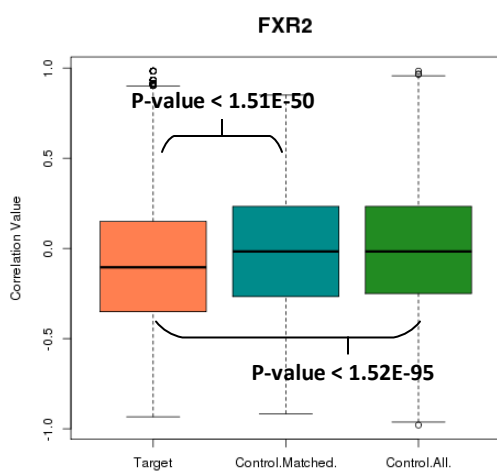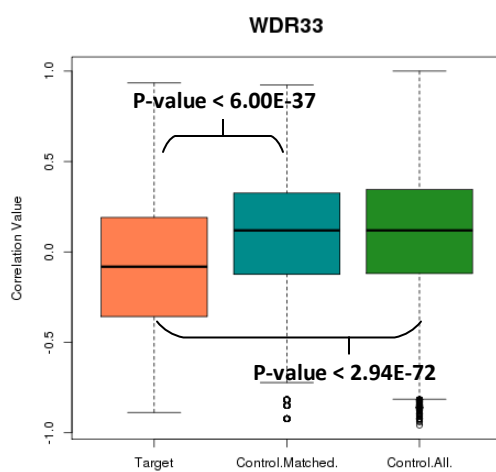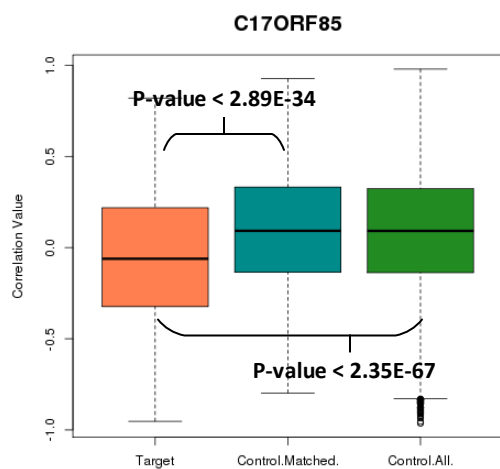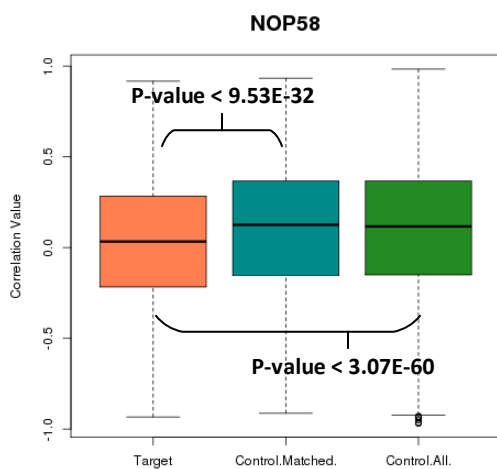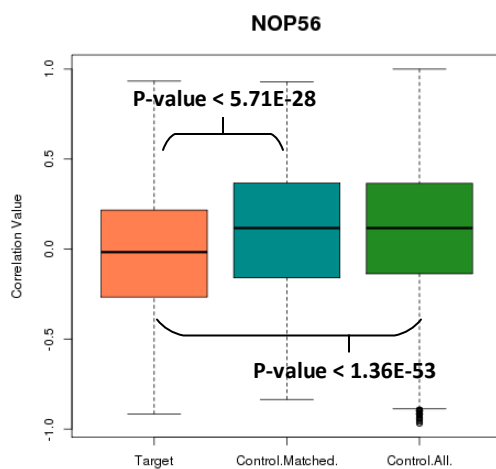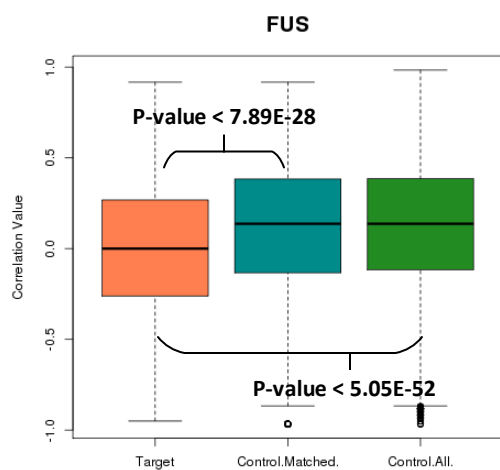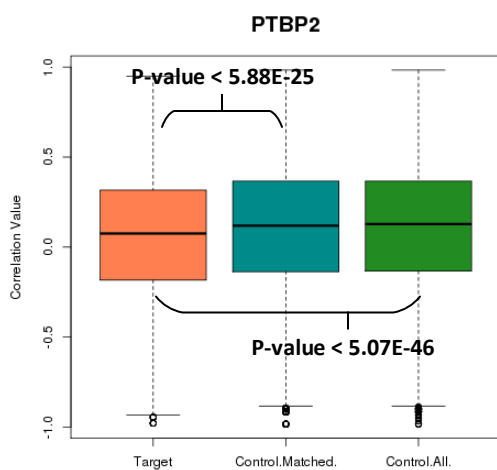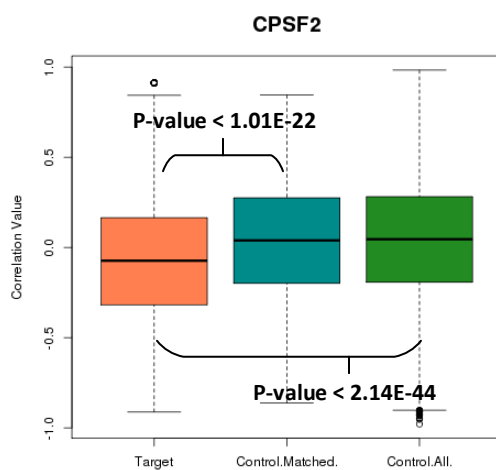

# Significantly Incongruent

### TNRC6B

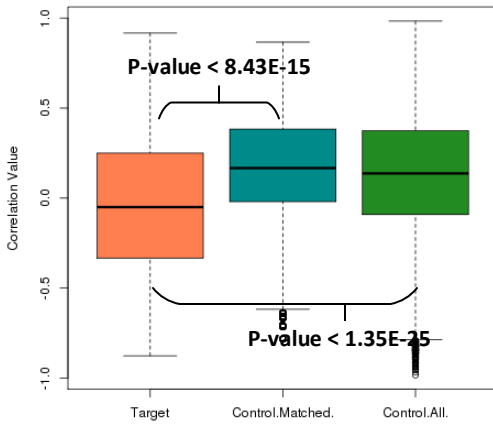

### AGO4

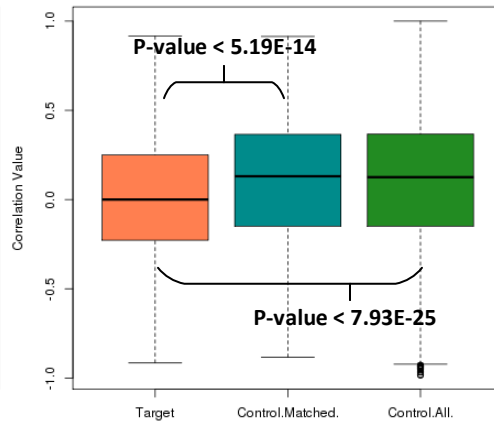

### TNRC6C

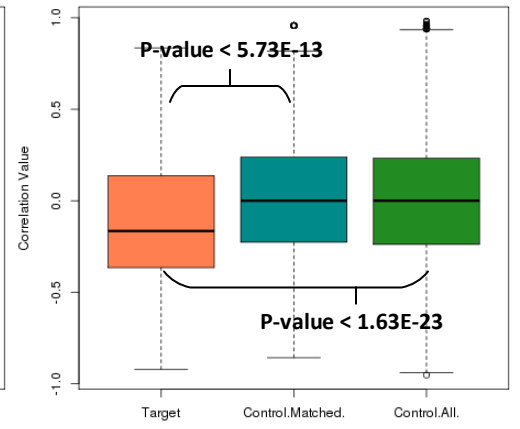

### QKI

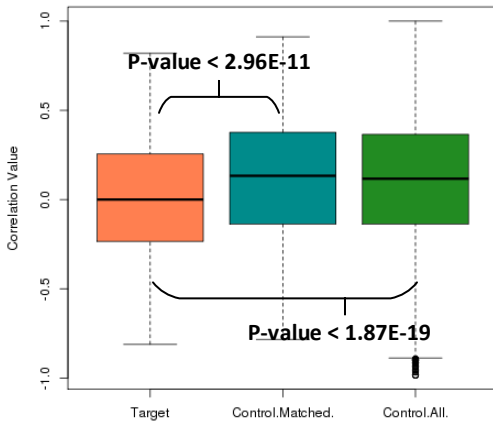

### ALKBH5

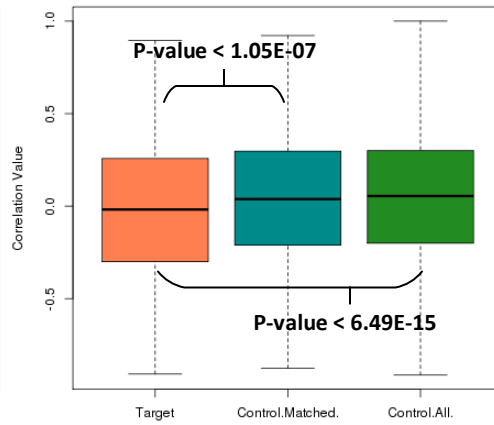

### FXR1

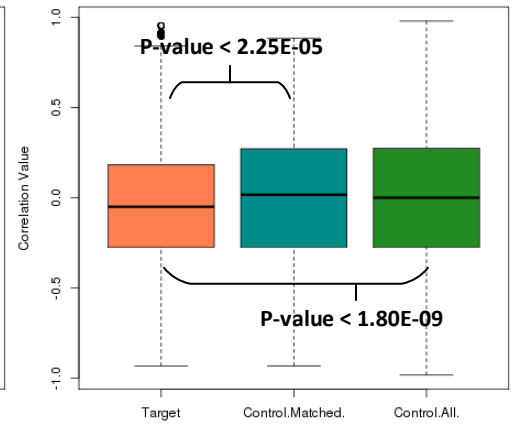

### PUM2

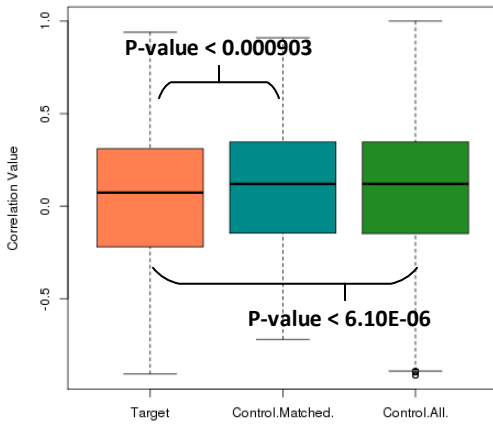

### IGF2BP2

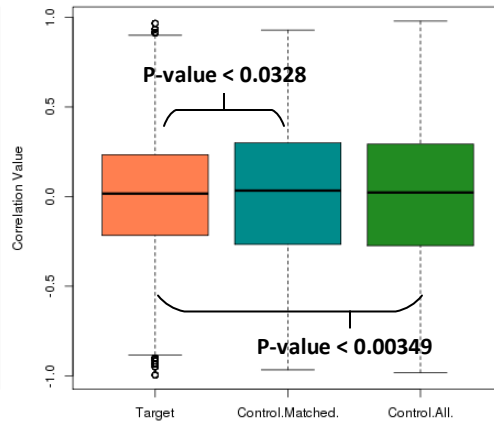

# No Significant Change

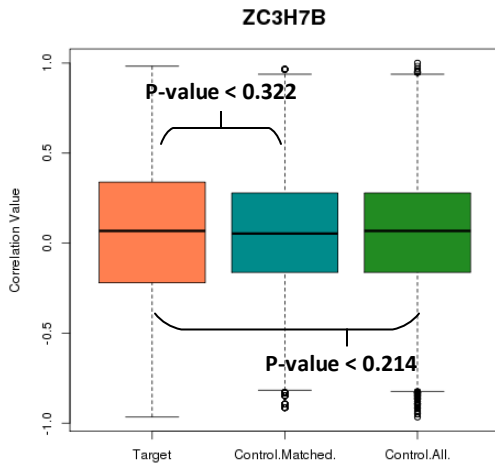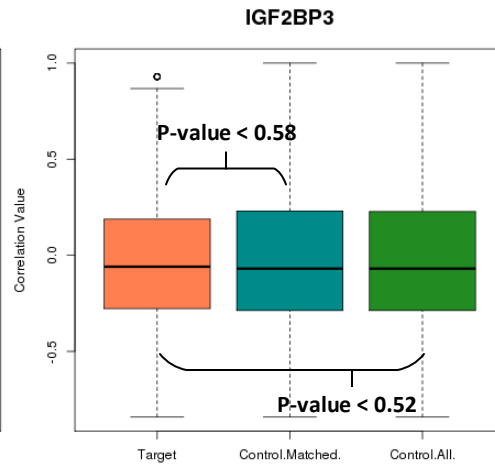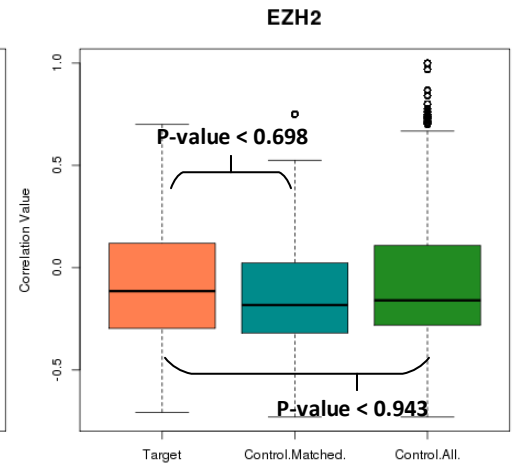

Supplementary figure 4:

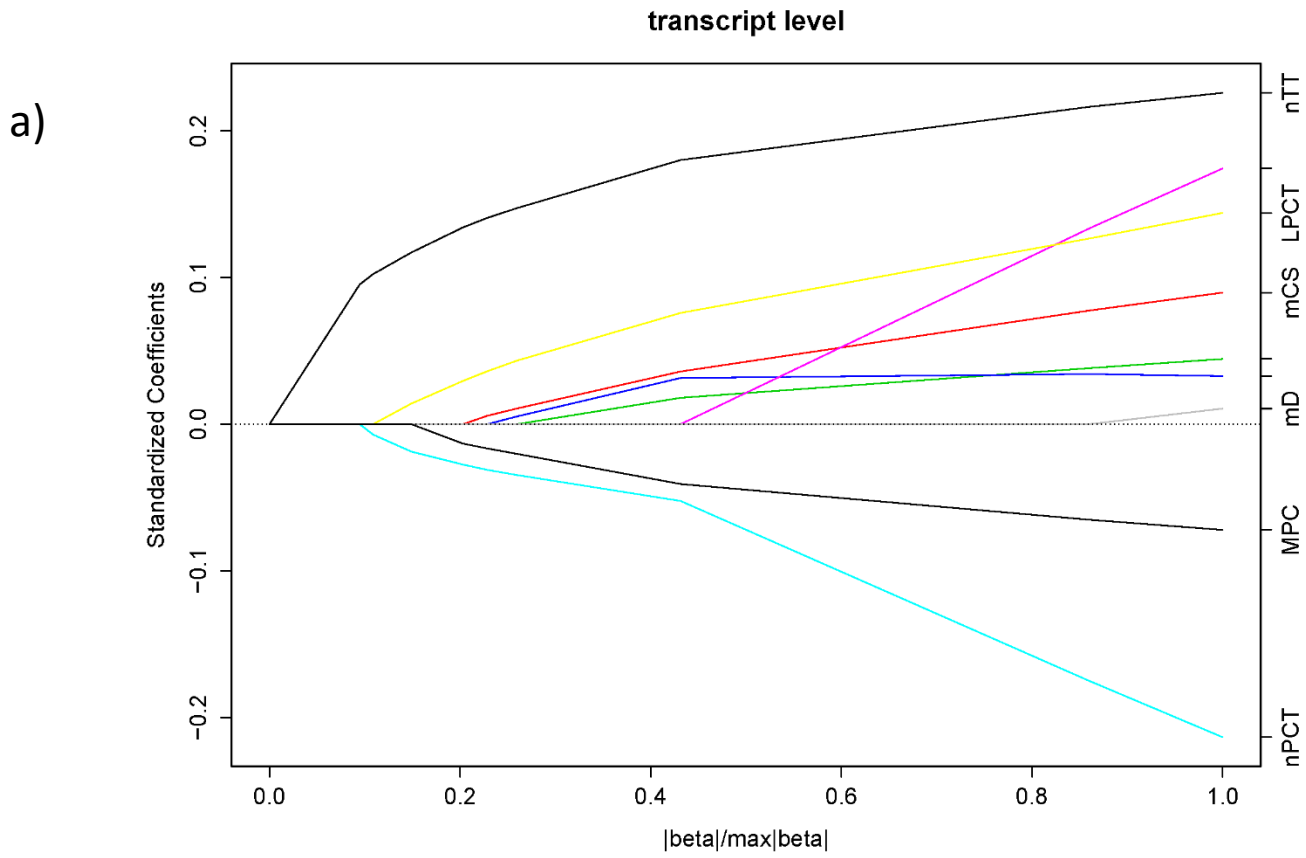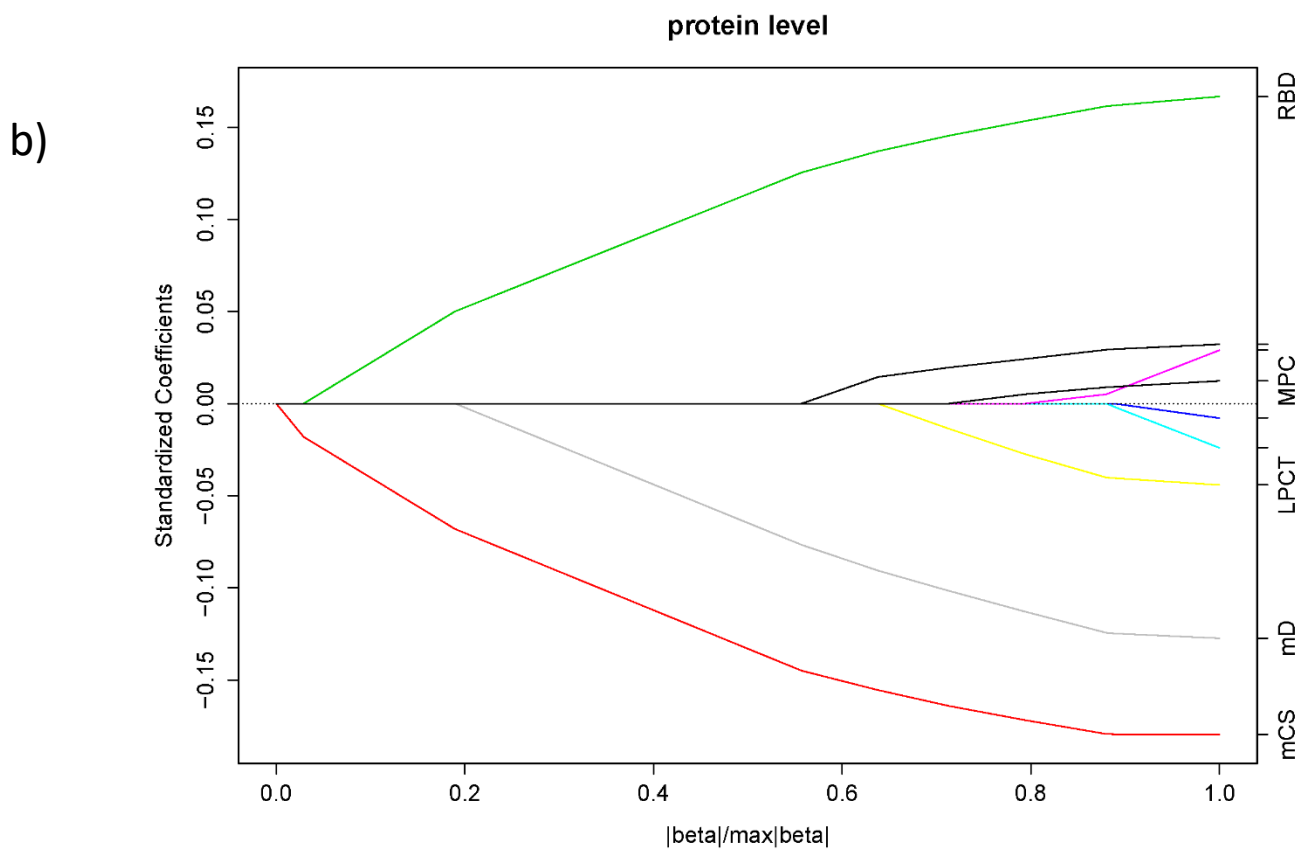



# Supplementary figure 5

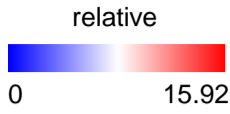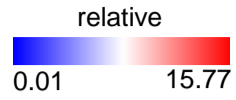

Transcript

Protein

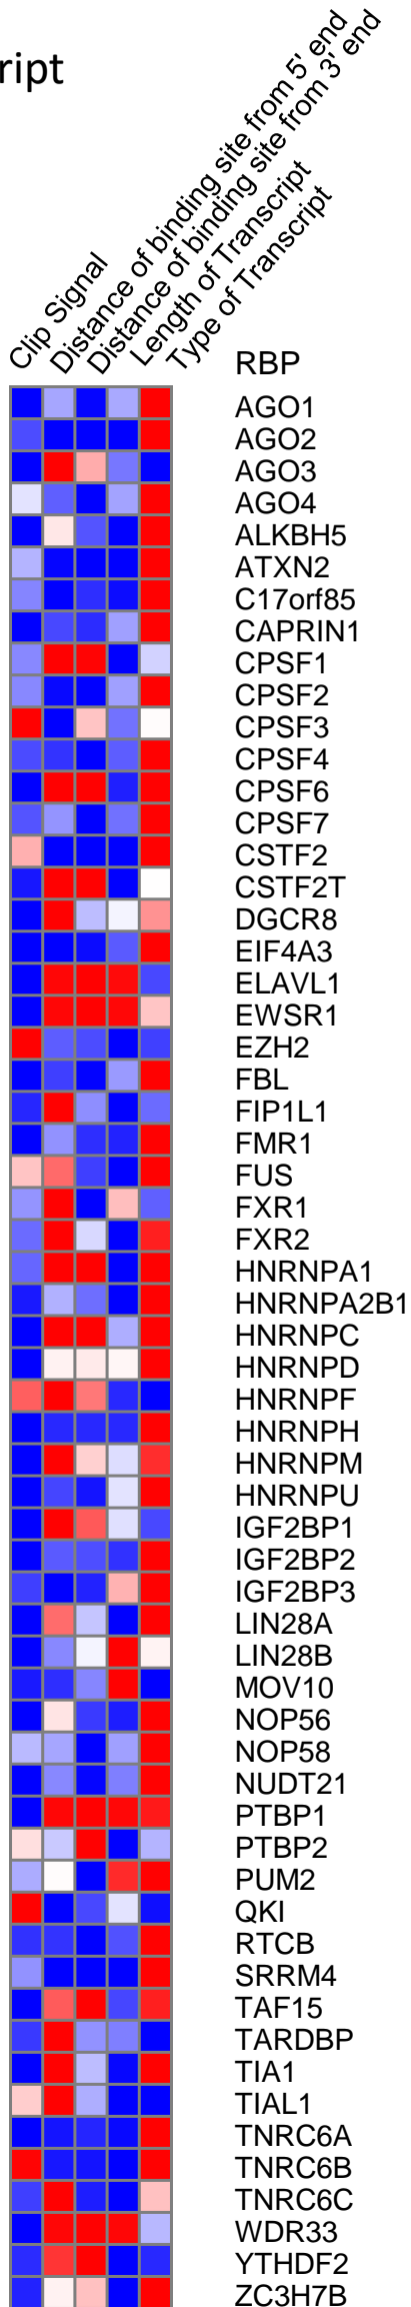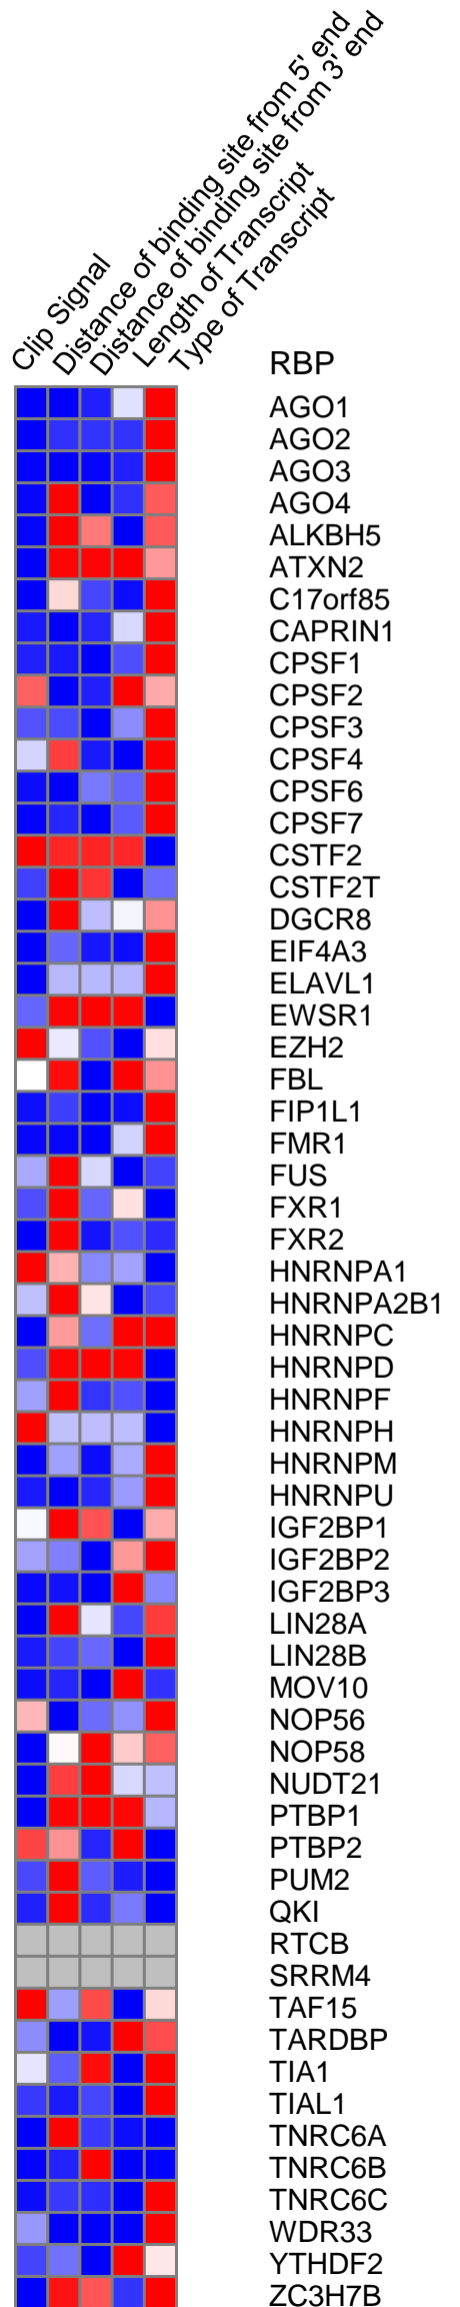

# Supplementary Table 1

BioGrid:

| <b>SYNC RBPs</b> |               |                               |                    |                  |
|------------------|---------------|-------------------------------|--------------------|------------------|
| <b>RBPs</b>      | <b>Degree</b> | <b>Clustering Coefficient</b> | <b>Betweenness</b> | <b>Closeness</b> |
| AGO1             | 44            | 0.02                          | 60472.139          | 0.00025          |
| AGO3             | 68            | 0.005                         | 81447.062          | 0.0002           |
| CPSF1            | 57            | 0.016                         | 59141.367          | 0.00025          |
| CPSF4            | 18            | 0.072                         | 4841.104           | 0.00019          |
| CPSF6            | 83            | 0.008                         | 55782.235          | 0.0002           |
| CPSF7            | 74            | 0.014                         | 79493.614          | 0.00025          |
| FMR1             | 55            | 0                             | 63287.892          | 0.0002           |
| HNRNPC           | 168           | 0.006                         | 139124.034         | 0.00023          |
| HNRNPU           | 519           | 0.001                         | 606967.202         | 0.00025          |
| MOV10            | 994           | 0                             | 1148344.935        | 0.00033          |
| PTBP2            | 22            | 0.026                         | 13595.795          | 0.0002           |
| PUM2             | 16            | 0                             | 12493.691          | 0.00019          |

| <b>NON-SYNC RBPs</b> |               |                               |                    |                  |
|----------------------|---------------|-------------------------------|--------------------|------------------|
| <b>RBPs</b>          | <b>Degree</b> | <b>Clustering Coefficient</b> | <b>Betweenness</b> | <b>Closeness</b> |
| AGO2                 | 90            | 0.005                         | 118926.942         | 0.00016          |
| AGO4                 | 67            | 0.004                         | 54735.439          | 0.00015          |
| ALKBH5               | 4             | 0                             | 188.434            | 0.00013          |
| ATXN2                | 56            | 0.012                         | 54610.188          | 0.00016          |
| C17ORF85             | 39            | 0                             | 29008.895          | 0.00015          |
| CAPRIN1              | 39            | 0.043                         | 15960.984          | 0.00016          |
| CPSF2                | 48            | 0.044                         | 39521.259          | 0.00015          |
| CPSF3                | 42            | 0.053                         | 23114.966          | 0.00015          |
| CSTF2                | 75            | 0.023                         | 82978.778          | 0.00017          |
| CSTF2T               | 20            | 0.168                         | 10889.791          | 0.00016          |
| DGCR8                | 51            | 0.019                         | 60836.47           | 0.00017          |
| EIF4A3               | 258           | 0.003                         | 273983.579         | 0.00017          |
| EWSR1                | 649           | 0.001                         | 1024972.094        | 0.00021          |
| FBL                  | 250           | 0.006                         | 298531.117         | 0.00017          |
| FIP1L1               | 58            | 0.031                         | 45743.06           | 0.00015          |
| FUS                  | 361           | 0.006                         | 507767.513         | 0.00021          |
| FXR1                 | 72            | 0.01                          | 74495.727          | 0.00015          |

|         |     |       |            |         |
|---------|-----|-------|------------|---------|
| FXR2    | 122 | 0.007 | 181205.292 | 0.00017 |
| HNRNPD  | 276 | 0.005 | 354840.867 | 0.00019 |
| HNRNPH  | 95  | 0.018 | 81394.104  | 0.00017 |
| HNRNPM  | 252 | 0.009 | 244242.176 | 0.00018 |
| IGF2BP1 | 71  | 0.006 | 38707.81   | 0.00015 |
| IGF2BP2 | 33  | 0.064 | 24985.179  | 0.00016 |
| LIN28A  | 90  | 0.004 | 87765.186  | 0.00015 |
| NOP58   | 110 | 0.017 | 77466.239  | 0.00016 |
| NUDT21  | 120 | 0.004 | 146965.559 | 0.00016 |
| PTBP1   | 139 | 0.019 | 120213.074 | 0.00018 |
| TARDBP  | 327 | 0.007 | 407768.294 | 0.00019 |
| TIA1    | 38  | 0     | 36107.231  | 0.00015 |
| TIAL1   | 57  | 0     | 50972.762  | 0.00015 |
| YTHDF2  | 40  | 0.029 | 24319.372  | 0.00016 |

## STRING:

| SYNC RBPs |        |                        |             |           |
|-----------|--------|------------------------|-------------|-----------|
| RBPs      | Degree | Clustering Coefficient | Betweenness | Closeness |
| AGO1      | 61     | 0.046                  | 8200.237    | 0.00139   |
| AGO3      | 55     | 0.056                  | 3164.624    | 0.00128   |
| CPSF1     | 10     | 0.289                  | 40.221      | 0.001     |
| CPSF4     | 32     | 0.05                   | 4819.317    | 0.00116   |
| CPSF6     | 20     | 0.105                  | 2578.936    | 0.00131   |
| CPSF7     | 104    | 0.022                  | 11591.343   | 0.0016    |
| FMR1      | 49     | 0.006                  | 10534.999   | 0.00134   |
| HNRNPC    | 10     | 0                      | 135.495     | 0.00103   |
| HNRNPU    | 119    | 0.014                  | 16270.507   | 0.00159   |
| MOV10     | 44     | 0.066                  | 4732.135    | 0.00128   |
| PTBP2     | 33     | 0                      | 7691.077    | 0.00122   |
| PUM2      | 21     | 0                      | 4557.498    | 0.00118   |

| SYNC RBPs |        |                        |             |           |
|-----------|--------|------------------------|-------------|-----------|
| RBPs      | Degree | Clustering Coefficient | Betweenness | Closeness |
| AGO2      | 65     | 0.025                  | 31779.344   | 0.00047   |

|          |     |          |            |         |
|----------|-----|----------|------------|---------|
| AGO4     | 56  | 0.027    | 19548.296  | 0.00042 |
| ALKBH5   | 5   | 0        | 3246       | 0.00029 |
| ATXN2    | 24  | 0.014    | 10031.608  | 0.00044 |
| C17ORF85 | 10  | 0        | 5679.216   | 0.00035 |
| CAPRIN1  | 9   | 0.083    | 1320.282   | 0.00041 |
| CPSF2    | 159 | 0.061    | 21813.829  | 0.00049 |
| CPSF3    | 157 | 0.062    | 22021.022  | 0.00049 |
| CSTF2    | 136 | 0.077    | 14883.491  | 0.00049 |
| CSTF2T   | 29  | 1.11E-01 | 1553.181   | 0.00043 |
| DGCR8    | 31  | 0.032    | 7537.98    | 0.00042 |
| EIF4A3   | 182 | 0.004    | 102746.524 | 0.00054 |
| EWSR1    | 32  | 0.018    | 13113.795  | 0.00044 |
| FBL      | 183 | 0.01     | 80217.904  | 0.00052 |
| FIP1L1   | 34  | 0.13     | 3359.221   | 0.00036 |
| FUS      | 127 | 0.085    | 20844.026  | 0.0005  |
| FXR1     | 39  | 0.051    | 12272.238  | 0.00044 |
| FXR2     | 37  | 0.056    | 10620.347  | 0.00044 |
| HNRNPD   | 155 | 0.057    | 41603.681  | 0.00051 |
| HNRNPM   | 125 | 0.09     | 23873.586  | 0.00052 |
| IGF2BP1  | 35  | 0.008    | 14773.88   | 0.00043 |
| IGF2BP2  | 26  | 0.009    | 10506.682  | 0.00042 |
| LIN28A   | 26  | 0.006    | 13431.744  | 0.00038 |
| NOP58    | 164 | 0.009    | 52877.228  | 0.00047 |
| NUDT21   | 110 | 0.112    | 4562.836   | 0.00048 |
| PTBP1    | 140 | 0.068    | 27709.284  | 0.0005  |
| TARDBP   | 37  | 0.018    | 16127.525  | 0.00044 |
| TIA1     | 17  | 0        | 8644.176   | 0.00036 |
| TIAL1    | 15  | 0        | 8587.596   | 0.00041 |
| YTHDF2   | 4   | 0        | 2436       | 0.0004  |
